# Supplementary material for: Genome-Wide Association Study and Selective Sweep Analysis Reveal the Genetic Architecture of Body Weights in a Chicken F2 Resource Population
Source: Front Vet Sci. 2022 Jul 26;9:875454. doi: 10.3389/fvets.2022.875454 (PMC9361851; doi:10.3389/fvets.2022.875454)
Supplement: Supplementary file 1 [file Table_1.xlsx]

## Sheet: Sheet1
Table S1. SNPs with a significant effect on BW1 - BW12 of the F2 resource population.
chr	position	-log10(P-value)	trait	rsID
1	167633506	8.2592	BW5	rs313731169
1	170650738	8.34745	BW5
1	171118038	9.01911	BW5	rs733565828
1	171403666	9.24909	BW5	rs315125235
1	171404041	8.48752	BW5
1	171411019	8.53035	BW5	rs316877904
1	171517763	8.70972	BW5	rs731190844
1	171638398	8.45033	BW5	rs316724410
1	171710979	8.45842	BW5	rs739449011
1	171925611	8.46675	BW5	rs313969005
1	171925771	8.51424	BW5	rs314313907
1	171926127	8.30066	BW5	rs741616644
1	167633506	8.5429	BW6	rs313731169
1	168979802	8.45031	BW6	rs315867914
1	170406320	8.27821	BW6	rs315641964
1	170633850	8.34004	BW6	rs13971985
1	170770493	8.41338	BW6	rs740421329
1	170772052	8.59646	BW6	rs734312108
1	170926098	8.47725	BW6	rs315506234
1	170930631	8.23878	BW6	rs15498473
1	171118038	8.6696	BW6	rs733565828
1	171362332	8.30056	BW6	rs317452353
1	171365672	8.23787	BW6	rs317277727
1	171404041	8.61385	BW6
1	171411019	10.4515	BW6	rs316877904
1	171517763	8.37615	BW6	rs731190844
1	171637568	8.21947	BW6	rs733870676
1	171638398	8.44256	BW6	rs316724410
1	171710979	8.53537	BW6	rs739449011
1	171925611	9.6163	BW6	rs313969005
1	171925771	9.86256	BW6	rs314313907
1	171926127	9.43377	BW6	rs741616644
1	168979017	8.2574	BW7	rs314629230
1	168979802	9.18384	BW7	rs315867914
1	170406320	8.53114	BW7	rs315641964
1	170548895	8.32085	BW7	rs313664704
1	170633850	9.28308	BW7	rs13971985
1	170644560	8.86003	BW7	rs735268334
1	170713988	9.42914	BW7	rs315503200
1	170714148	9.42914	BW7	rs736315237
1	170715097	8.8573	BW7
1	170742770	8.92745	BW7	rs731599186
1	170743966	9.43713	BW7	rs731822485
1	170770493	8.51365	BW7	rs740421329
1	170771629	10.0712	BW7	rs316186152
1	170772052	8.53577	BW7	rs734312108
1	170908301	9.3463	BW7	rs312321230
1	170908325	9.3463	BW7	rs316475742
1	170926098	10.7282	BW7	rs315506234
1	170926202	9.44401	BW7	rs732398250
1	170926223	9.44401	BW7	rs316119888
1	170930631	10.1954	BW7	rs15498473
1	170958478	8.60936	BW7	rs316959205
1	170958562	8.60936	BW7	rs313640831
1	170958630	8.51995	BW7	rs737087670
1	170958784	8.51995	BW7	rs15498555
1	171002552	8.46502	BW7	rs313699839
1	171008784	8.34427	BW7	rs13553157
1	171118038	9.73971	BW7	rs733565828
1	171362332	9.58702	BW7	rs317452353
1	171362899	9.33513	BW7	rs314672161
1	171364773	9.03002	BW7	rs735397162
1	171364818	9.03002	BW7	rs740186183
1	171364979	8.91086	BW7	rs317428859
1	171365568	9.50027	BW7	rs314632905
1	171365606	9.50027	BW7	rs312472304
1	171365672	9.7057	BW7	rs317277727
1	171371184	8.24712	BW7	rs315629676
1	171371723	8.43593	BW7	rs315865825
1	171372373	9.33927	BW7	rs316780267
1	171377836	8.96564	BW7	rs314053757
1	171403666	8.58514	BW7	rs315125235
1	171404041	9.4552	BW7
1	171411019	12.8217	BW7	rs316877904
1	171464516	9.03211	BW7	rs314672135
1	171465954	9.04681	BW7	rs314456099
1	171466993	8.98972	BW7	rs312509054
1	171467115	8.98972	BW7	rs314827173
1	171468296	8.78665	BW7	rs312736578
1	171469538	8.43867	BW7	rs736575089
1	171469602	9.137	BW7	rs730970292
1	171487576	8.58029	BW7	rs318080543
1	171487868	8.94127	BW7	rs315645105
1	171489039	10.2855	BW7	rs315869490
1	171515600	8.6415	BW7	rs314095399
1	171515735	8.27668	BW7	rs312570957
1	171517763	10.1822	BW7	rs731190844
1	171577203	8.61212	BW7	rs15500126
1	171577225	8.61212	BW7	rs15500128
1	171625129	8.4335	BW7	rs315907094
1	171637568	8.60627	BW7	rs733870676
1	171638398	8.80254	BW7	rs316724410
1	171710979	10.5423	BW7	rs739449011
1	171855814	8.35154	BW7	rs738861504
1	171862866	8.35154	BW7	rs15501212
1	171862880	8.35154	BW7	rs15501214
1	171863318	8.35154	BW7	rs732650175
1	171911018	8.34323	BW7	rs313913830
1	171925611	11.0541	BW7	rs313969005
1	171925771	11.3277	BW7	rs314313907
1	171926127	10.8788	BW7	rs741616644
1	171926492	8.52068	BW7	rs15501348
1	171926496	8.44058	BW7	rs14918165
1	171926520	9.14544	BW7	rs15501350
1	171993152	8.3506	BW7	rs313542789
1	171993404	8.31829	BW7	rs15501576
1	171994053	8.21367	BW7	rs14918206
1	172370662	8.26472	BW7	rs316303008
1	172388918	8.74025	BW7	rs313016000
1	172558359	8.52958	BW7	rs737637228
1	172558655	8.48179	BW7	rs315137835
1	167633506	8.37709	BW8	rs313731169
1	168502135	8.97394	BW8	rs732055917
1	168978874	9.33145	BW8	rs15493192
1	168979017	9.62976	BW8	rs314629230
1	168979802	10.3253	BW8	rs315867914
1	169095045	8.24248	BW8	rs314034353
1	169101214	8.26337	BW8	rs314193662
1	169101220	8.5028	BW8	rs736659284
1	169119338	8.26823	BW8	rs316087076
1	169169201	8.2232	BW8	rs738037104
1	170398020	8.40287	BW8	rs737505340
1	170406320	9.67926	BW8	rs315641964
1	170438598	8.51133	BW8	rs313341750
1	170440890	8.48264	BW8	rs15497492
1	170455128	8.26188	BW8	rs317434637
1	170515622	9.10553	BW8	rs730992520
1	170518663	9.01762	BW8	rs316179053
1	170546067	8.69799	BW8	rs316248999
1	170546724	8.43757	BW8	rs313892299
1	170546735	8.27721	BW8	rs317941918
1	170546742	8.27721	BW8	rs737254161
1	170548074	10.1828	BW8	rs734149332
1	170548895	10.2435	BW8	rs313664704
1	170550073	8.37925	BW8	rs736980172
1	170550988	8.24854	BW8	rs317879889
1	170551108	8.79806	BW8	rs313936052
1	170551522	9.07381	BW8	rs313323023
1	170553291	8.65467	BW8	rs13971848
1	170565846	8.4636	BW8	rs736349122
1	170567580	9.55653	BW8	rs315775996
1	170567686	9.67429	BW8	rs313337558
1	170567689	9.67429	BW8	rs739979678
1	170572223	8.2982	BW8	rs313184016
1	170572408	10.2674	BW8	rs739944425
1	170572411	10.2674	BW8	rs732439638
1	170572413	10.2674	BW8	rs735967012
1	170594737	8.76313	BW8	rs431834495
1	170606359	9.47478	BW8	rs317953773
1	170633850	11.5263	BW8	rs13971985
1	170644560	10.4408	BW8	rs735268334
1	170650738	8.1994	BW8
1	170651190	10.4286	BW8	rs740529018
1	170653354	8.90177	BW8	rs14916856
1	170666313	8.36624	BW8	rs315839668
1	170673670	8.57269	BW8	rs734750566
1	170678600	9.19029	BW8	rs15497991
1	170681240	8.596	BW8	rs317476696
1	170681654	8.48089	BW8	rs316188363
1	170713988	11.7625	BW8	rs315503200
1	170714148	11.7625	BW8	rs736315237
1	170714730	8.50844	BW8	rs316120475
1	170715097	11.4138	BW8
1	170742770	9.36638	BW8	rs731599186
1	170743966	12.4671	BW8	rs731822485
1	170768292	8.24778	BW8	rs794561797
1	170770493	10.3552	BW8	rs740421329
1	170771115	9.17953	BW8	rs14917032
1	170771629	11.1461	BW8	rs316186152
1	170772052	11.9705	BW8	rs734312108
1	170773444	8.27396	BW8	rs312375628
1	170886487	8.50571	BW8	rs739916643
1	170908301	11.4722	BW8	rs312321230
1	170908325	11.4722	BW8	rs316475742
1	170917580	9.30405	BW8	rs14917149
1	170922258	9.39695	BW8	rs317915761
1	170926098	13.9001	BW8	rs315506234
1	170926202	12.1983	BW8	rs732398250
1	170926223	12.1983	BW8	rs316119888
1	170930631	12.9057	BW8	rs15498473
1	170946989	8.6187	BW8	rs314833405
1	170951872	11.0386	BW8	rs316357510
1	170953136	11.6226	BW8	rs317737699
1	170953402	11.6226	BW8	rs315233289
1	170953703	11.6226	BW8	rs314251540
1	170953844	11.6226	BW8	rs731380754
1	170954022	11.6226	BW8	rs318166780
1	170954886	11.6226	BW8	rs315057142
1	170958478	10.3969	BW8	rs316959205
1	170958562	10.3969	BW8	rs313640831
1	170958629	11.7759	BW8	rs732302734
1	170958630	10.2899	BW8	rs737087670
1	170958784	10.2899	BW8	rs15498555
1	170959057	11.1138	BW8	rs314833461
1	170959264	8.27037	BW8	rs317793952
1	171000739	9.15715	BW8	rs732771236
1	171002552	10.377	BW8	rs313699839
1	171008784	10.7954	BW8	rs13553157
1	171118038	10.2562	BW8	rs733565828
1	171119678	8.37219	BW8	rs731205078
1	171224319	8.35953	BW8	rs315020398
1	171224443	8.26465	BW8	rs313233926
1	171224474	8.26465	BW8	rs731306998
1	171362312	8.4322	BW8	rs739453838
1	171362332	11.5756	BW8	rs317452353
1	171362899	10.5189	BW8	rs314672161
1	171364773	11.1203	BW8	rs735397162
1	171364818	11.1203	BW8	rs740186183
1	171364979	11.1744	BW8	rs317428859
1	171365568	11.4058	BW8	rs314632905
1	171365606	11.4058	BW8	rs312472304
1	171365672	11.3886	BW8	rs317277727
1	171366142	8.38249	BW8	rs736126168
1	171371184	10.013	BW8	rs315629676
1	171371723	9.8506	BW8	rs315865825
1	171372373	11.4118	BW8	rs316780267
1	171372840	9.04488	BW8	rs731719077
1	171377836	9.74463	BW8	rs314053757
1	171381835	9.80593	BW8	rs741337409
1	171386987	8.41262	BW8	rs15499448
1	171388476	8.93726	BW8	rs13553334
1	171403666	8.79528	BW8	rs315125235
1	171404041	11.2487	BW8
1	171405102	9.74546	BW8	rs317415475
1	171407699	9.81136	BW8	rs736162997
1	171411019	16.8878	BW8	rs316877904
1	171412017	10.3346	BW8	rs14917638
1	171413086	8.65368	BW8	rs315767128
1	171418735	9.406	BW8	rs13972702
1	171420331	9.72754	BW8	rs313719925
1	171422635	10.2503	BW8	rs313132938
1	171423241	8.2323	BW8	rs739700769
1	171426647	8.85026	BW8	rs315995692
1	171429575	8.73199	BW8	rs13972715
1	171432804	9.58863	BW8	rs733196830
1	171433202	9.58863	BW8
1	171433213	9.58863	BW8	rs733761687
1	171434742	9.58863	BW8
1	171434923	9.58863	BW8	rs733248352
1	171435060	9.58863	BW8
1	171435231	9.58863	BW8	rs739980081
1	171435265	9.58863	BW8	rs737179815
1	171440959	9.6261	BW8	rs738350161
1	171442503	9.58863	BW8
1	171442974	9.68143	BW8
1	171452607	9.93172	BW8	rs316188937
1	171458203	8.36862	BW8	rs316918119
1	171459863	9.48412	BW8
1	171461195	9.76898	BW8	rs313197010
1	171464516	11.5409	BW8	rs314672135
1	171465702	9.78627	BW8	rs316864061
1	171465954	11.5573	BW8	rs314456099
1	171466993	11.617	BW8	rs312509054
1	171467115	11.617	BW8	rs314827173
1	171468296	11.1752	BW8	rs312736578
1	171469538	10.4245	BW8	rs736575089
1	171469602	11.6586	BW8	rs730970292
1	171473229	10.1072	BW8	rs13553400
1	171473238	10.027	BW8	rs13553401
1	171473336	10.7568	BW8	rs13553402
1	171487576	10.8047	BW8	rs318080543
1	171487868	11.244	BW8	rs315645105
1	171489039	12.8905	BW8	rs315869490
1	171489566	9.09172	BW8	rs733384594
1	171489591	9.09172	BW8	rs736802197
1	171515600	9.70737	BW8	rs314095399
1	171515735	9.33982	BW8	rs312570957
1	171517763	11.3617	BW8	rs731190844
1	171519244	8.52709	BW8	rs736808236
1	171572124	8.40142	BW8	rs738653021
1	171573467	8.40142	BW8	rs15500089
1	171573972	8.57564	BW8	rs738645989
1	171574086	8.40142	BW8	rs734525675
1	171577203	11.6607	BW8	rs15500126
1	171577225	11.6607	BW8	rs15500128
1	171577274	9.40252	BW8	rs317713873
1	171604746	8.38729	BW8	rs739271258
1	171604784	8.31877	BW8	rs733175010
1	171604813	8.2466	BW8	rs315191503
1	171611653	8.68068	BW8	rs314098918
1	171611698	8.86676	BW8	rs312898009
1	171624646	8.48216	BW8	rs15500375
1	171624672	8.37338	BW8	rs15500376
1	171624691	8.46433	BW8	rs312555154
1	171625129	10.1525	BW8	rs315907094
1	171633458	8.66798	BW8	rs739241822
1	171636364	8.49462	BW8	rs315209253
1	171636763	11.6958	BW8	rs318136400
1	171637568	8.76626	BW8	rs733870676
1	171638398	10.4314	BW8	rs316724410
1	171677914	11.5315	BW8	rs730956794
1	171695646	9.42043	BW8	rs316051711
1	171696414	9.3679	BW8	rs15500616
1	171697752	8.73218	BW8	rs737083237
1	171697759	8.73218	BW8	rs740391202
1	171698163	10.044	BW8	rs312984801
1	171699261	10.8084	BW8	rs734670427
1	171699943	8.95824	BW8	rs13973205
1	171699945	8.95824	BW8	rs13973206
1	171702670	10.3321	BW8	rs314730771
1	171702819	10.6016	BW8	rs315747420
1	171705751	9.03932	BW8	rs316539883
1	171707259	8.72423	BW8	rs314242999
1	171707315	8.81693	BW8	rs312789572
1	171710979	14.5606	BW8	rs739449011
1	171812912	8.78354	BW8	rs314876934
1	171813189	8.61465	BW8	rs315302623
1	171815746	8.31925	BW8	rs317513630
1	171855424	9.3354	BW8	rs312459650
1	171855780	9.3354	BW8	rs741759991
1	171855814	9.74945	BW8	rs738861504
1	171855863	9.3354	BW8	rs731361645
1	171856012	9.3354	BW8	rs736140408
1	171856525	9.3354	BW8	rs15501200
1	171857892	9.3354	BW8	rs738979866
1	171862866	9.74945	BW8	rs15501212
1	171862880	9.74945	BW8	rs15501214
1	171863318	9.74945	BW8	rs732650175
1	171863825	9.3354	BW8	rs735718910
1	171867661	9.3354	BW8	rs733174408
1	171871837	9.3354	BW8	rs736412312
1	171872088	8.24722	BW8	rs741675199
1	171872879	9.3354	BW8	rs735878135
1	171873853	9.3354	BW8
1	171905665	8.7858	BW8	rs314611924
1	171905739	9.45812	BW8	rs732273136
1	171906127	8.63124	BW8	rs317018912
1	171906488	9.27269	BW8	rs316051873
1	171907512	8.51473	BW8	rs316769937
1	171907706	8.36943	BW8	rs737625086
1	171911018	10.5172	BW8	rs313913830
1	171925611	15.9884	BW8	rs313969005
1	171925771	16.419	BW8	rs314313907
1	171926127	15.7267	BW8	rs741616644
1	171926492	12.2506	BW8	rs15501348
1	171926496	12.1542	BW8	rs14918165
1	171926520	13.0565	BW8	rs15501350
1	171942297	8.67791	BW8	rs14918177
1	171993152	9.8294	BW8	rs313542789
1	171993404	9.75709	BW8	rs15501576
1	171993896	8.22582	BW8	rs14918204
1	171993919	9.14484	BW8	rs14918205
1	171994053	9.95729	BW8	rs14918206
1	171995193	8.41167	BW8	rs735158066
1	171999917	8.89298	BW8	rs732915857
1	172000345	8.97445	BW8	rs312318959
1	172001909	9.23453	BW8	rs15501602
1	172028764	8.21535	BW8	rs313807252
1	172032490	8.32351	BW8	rs15501698
1	172056430	8.35186	BW8	rs314918911
1	172066303	8.26477	BW8	rs736271942
1	172081850	9.32523	BW8	rs731265008
1	172082229	9.29764	BW8	rs13553685
1	172083547	8.86615	BW8	rs317813154
1	172084437	8.86615	BW8	rs732224722
1	172096520	8.21618	BW8	rs733999549
1	172096764	9.16695	BW8	rs737990005
1	172154625	9.03975	BW8	rs313082042
1	172155770	8.51383	BW8	rs13973774
1	172158628	9.44186	BW8	rs312437604
1	172159377	9.03975	BW8	rs735502708
1	172159867	9.28005	BW8	rs313217617
1	172160188	8.67287	BW8	rs736702241
1	172160190	8.86788	BW8	rs740135836
1	172160297	9.03975	BW8	rs317855961
1	172160677	8.97013	BW8	rs314953709
1	172161061	9.04457	BW8	rs15502111
1	172161491	9.13261	BW8	rs731442333
1	172161794	8.78625	BW8	rs15502113
1	172164642	9.11945	BW8	rs732251593
1	172236764	8.28564	BW8	rs732544834
1	172237075	8.3188	BW8	rs737919141
1	172237592	8.28564	BW8	rs735631254
1	172241384	8.28564	BW8	rs740202888
1	172242098	8.28564	BW8	rs315933633
1	172242276	8.28564	BW8	rs734957182
1	172242319	8.28564	BW8	rs738275821
1	172243116	8.44228	BW8	rs736440393
1	172245245	8.61359	BW8	rs737644989
1	172246004	9.532	BW8	rs731234714
1	172246069	8.61359	BW8	rs735976541
1	172258749	8.76008	BW8	rs741751999
1	172352866	8.42703	BW8	rs14918700
1	172361777	8.52947	BW8	rs14918710
1	172362049	8.70578	BW8	rs14918712
1	172367018	8.51055	BW8	rs314854093
1	172370653	8.40808	BW8	rs312811650
1	172382758	9.08521	BW8	rs317811986
1	172388918	8.96664	BW8	rs313016000
1	172538221	8.45153	BW8	rs315934994
1	172543541	9.0668	BW8	rs13974259
1	172544995	8.3495	BW8	rs14918846
1	172558359	9.0876	BW8	rs737637228
1	172558655	10.088	BW8	rs315137835
1	172569848	8.31176	BW8	rs315287068
1	172569900	8.31176	BW8	rs737251158
1	172585476	8.61772	BW8	rs312418943
1	172587354	9.07261	BW8	rs314105915
1	172595609	8.37237	BW8	rs15503193
1	172601197	8.21019	BW8	rs312748571
1	172602534	9.66215	BW8	rs312476986
1	172627998	8.6537	BW8	rs315737821
1	172656083	9.48261	BW8	rs14918911
1	167633506	8.20233	BW9	rs313731169
1	168979802	9.03506	BW9	rs315867914
1	170406320	8.74981	BW9	rs315641964
1	170515622	8.22544	BW9	rs730992520
1	170548074	9.43333	BW9	rs734149332
1	170548895	9.63802	BW9	rs313664704
1	170567580	8.30767	BW9	rs315775996
1	170567686	8.33245	BW9	rs313337558
1	170567689	8.33245	BW9	rs739979678
1	170572408	8.85189	BW9	rs739944425
1	170572411	8.85189	BW9	rs732439638
1	170572413	8.85189	BW9	rs735967012
1	170606359	8.68589	BW9	rs317953773
1	170633850	10.8169	BW9	rs13971985
1	170644560	9.59761	BW9	rs735268334
1	170651190	9.38614	BW9	rs740529018
1	170678600	8.61204	BW9	rs15497991
1	170681240	8.71209	BW9	rs317476696
1	170713988	10.5786	BW9	rs315503200
1	170714148	10.5786	BW9	rs736315237
1	170715097	9.85406	BW9
1	170742770	8.33594	BW9	rs731599186
1	170743966	10.7804	BW9	rs731822485
1	170770493	9.13661	BW9	rs740421329
1	170771629	10.1426	BW9	rs316186152
1	170772052	11.1075	BW9	rs734312108
1	170908301	10.0824	BW9	rs312321230
1	170908325	10.0824	BW9	rs316475742
1	170926098	11.6232	BW9	rs315506234
1	170926202	10.0988	BW9	rs732398250
1	170926223	10.0988	BW9	rs316119888
1	170930631	10.7772	BW9	rs15498473
1	170951872	8.87369	BW9	rs316357510
1	170953136	9.36848	BW9	rs317737699
1	170953402	9.36848	BW9	rs315233289
1	170953703	9.36848	BW9	rs314251540
1	170953844	9.36848	BW9	rs731380754
1	170954022	9.36848	BW9	rs318166780
1	170954886	9.36848	BW9	rs315057142
1	170958478	8.73717	BW9	rs316959205
1	170958562	8.73717	BW9	rs313640831
1	170958629	9.43599	BW9	rs732302734
1	170958630	8.71983	BW9	rs737087670
1	170958784	8.71983	BW9	rs15498555
1	170959057	8.91941	BW9	rs314833461
1	171002552	8.28313	BW9	rs313699839
1	171008784	9.39066	BW9	rs13553157
1	171118038	9.27786	BW9	rs733565828
1	171362332	10.1201	BW9	rs317452353
1	171362899	9.46016	BW9	rs314672161
1	171364773	9.28685	BW9	rs735397162
1	171364818	9.28685	BW9	rs740186183
1	171364979	9.49881	BW9	rs317428859
1	171365568	9.81207	BW9	rs314632905
1	171365606	9.81207	BW9	rs312472304
1	171365672	10.2203	BW9	rs317277727
1	171371184	9.31156	BW9	rs315629676
1	171371723	9.25515	BW9	rs315865825
1	171372373	10.063	BW9	rs316780267
1	171377836	9.18115	BW9	rs314053757
1	171381835	8.55567	BW9	rs741337409
1	171388476	8.29434	BW9	rs13553334
1	171404041	10.5998	BW9
1	171407699	8.84799	BW9	rs736162997
1	171411019	14.1787	BW9	rs316877904
1	171412017	8.6936	BW9	rs14917638
1	171422635	8.33639	BW9	rs313132938
1	171464516	9.82089	BW9	rs314672135
1	171465954	9.75021	BW9	rs314456099
1	171466993	9.89966	BW9	rs312509054
1	171467115	9.89966	BW9	rs314827173
1	171468296	9.85101	BW9	rs312736578
1	171469538	9.28678	BW9	rs736575089
1	171469602	9.91045	BW9	rs730970292
1	171473238	8.26898	BW9	rs13553401
1	171473336	8.82936	BW9	rs13553402
1	171487576	8.62547	BW9	rs318080543
1	171487868	9.11891	BW9	rs315645105
1	171489039	10.099	BW9	rs315869490
1	171515600	8.22528	BW9	rs314095399
1	171517763	9.58048	BW9	rs731190844
1	171577203	9.10612	BW9	rs15500126
1	171577225	9.10612	BW9	rs15500128
1	171625129	9.19676	BW9	rs315907094
1	171636763	9.71426	BW9	rs318136400
1	171638398	9.58761	BW9	rs316724410
1	171677914	9.42999	BW9	rs730956794
1	171699261	8.3579	BW9	rs734670427
1	171702819	8.20995	BW9	rs315747420
1	171710979	11.7554	BW9	rs739449011
1	171855424	8.21475	BW9	rs312459650
1	171855780	8.21475	BW9	rs741759991
1	171855814	8.68366	BW9	rs738861504
1	171855863	8.21475	BW9	rs731361645
1	171856012	8.21475	BW9	rs736140408
1	171856525	8.21475	BW9	rs15501200
1	171857892	8.21475	BW9	rs738979866
1	171862866	8.68366	BW9	rs15501212
1	171862880	8.68366	BW9	rs15501214
1	171863318	8.68366	BW9	rs732650175
1	171863825	8.21475	BW9	rs735718910
1	171867661	8.21475	BW9	rs733174408
1	171871837	8.21475	BW9	rs736412312
1	171872879	8.21475	BW9	rs735878135
1	171873853	8.21475	BW9
1	171911018	8.66735	BW9	rs313913830
1	171925611	11.7898	BW9	rs313969005
1	171925771	12.3308	BW9	rs314313907
1	171926127	11.9989	BW9	rs741616644
1	171926492	9.85878	BW9	rs15501348
1	171926496	9.79007	BW9	rs14918165
1	171926520	10.1911	BW9	rs15501350
1	171993152	8.46973	BW9	rs313542789
1	171993404	8.43137	BW9	rs15501576
1	171994053	8.5132	BW9	rs14918206
1	171999917	8.48615	BW9	rs732915857
1	172158628	8.60211	BW9	rs312437604
1	172159867	8.31881	BW9	rs313217617
1	172161491	8.43464	BW9	rs731442333
1	172164642	8.49024	BW9	rs732251593
1	172388918	8.7012	BW9	rs313016000
1	172558359	8.22396	BW9	rs737637228
1	168979802	8.66874	BW10	rs315867914
1	170398020	8.55776	BW10	rs737505340
1	170406320	8.65441	BW10	rs315641964
1	170438598	9.42645	BW10	rs313341750
1	170440890	9.39091	BW10	rs15497492
1	170455128	8.2849	BW10	rs317434637
1	170458425	8.7798	BW10	rs15497545
1	170474308	9.11987	BW10	rs318226750
1	170515622	8.78368	BW10	rs730992520
1	170518663	8.53672	BW10	rs316179053
1	170520555	8.27651	BW10	rs314804026
1	170539789	9.00418	BW10	rs794667586
1	170543105	8.66934	BW10	rs14916708
1	170546067	9.16297	BW10	rs316248999
1	170546724	8.99831	BW10	rs313892299
1	170546735	8.65342	BW10	rs317941918
1	170546742	8.65342	BW10	rs737254161
1	170548074	10.905	BW10	rs734149332
1	170548895	11.0104	BW10	rs313664704
1	170551108	8.31382	BW10	rs313936052
1	170551522	8.23505	BW10	rs313323023
1	170553291	8.3154	BW10	rs13971848
1	170558172	8.25351	BW10	rs731096753
1	170567580	9.42933	BW10	rs315775996
1	170567686	9.57603	BW10	rs313337558
1	170567689	9.57603	BW10	rs739979678
1	170567964	8.53205	BW10	rs13971858
1	170568065	8.53205	BW10	rs13971859
1	170568112	8.41638	BW10	rs13971860
1	170568136	8.22434	BW10	rs13971861
1	170572223	8.62161	BW10	rs313184016
1	170572408	9.6979	BW10	rs739944425
1	170572411	9.6979	BW10	rs732439638
1	170572413	9.6979	BW10	rs735967012
1	170578680	8.48362	BW10	rs732460163
1	170578685	8.30822	BW10	rs734537674
1	170606359	9.79186	BW10	rs317953773
1	170627217	8.22125	BW10	rs317882491
1	170627281	8.30384	BW10	rs315996566
1	170629592	8.52606	BW10	rs312509936
1	170633067	8.21649	BW10	rs314989414
1	170633850	11.6185	BW10	rs13971985
1	170644209	8.32747	BW10	rs15497939
1	170644560	9.66861	BW10	rs735268334
1	170649438	8.86845	BW10	rs314045327
1	170651190	10.9231	BW10	rs740529018
1	170673670	9.57359	BW10	rs734750566
1	170678600	9.79777	BW10	rs15497991
1	170681240	8.4818	BW10	rs317476696
1	170713988	11.9147	BW10	rs315503200
1	170714148	11.9147	BW10	rs736315237
1	170714730	9.52684	BW10	rs316120475
1	170715097	11.2305	BW10
1	170742770	9.55159	BW10	rs731599186
1	170743966	12.1551	BW10	rs731822485
1	170770493	9.22042	BW10	rs740421329
1	170771629	11.2961	BW10	rs316186152
1	170772052	11.4466	BW10	rs734312108
1	170872752	8.89019	BW10	rs312384305
1	170873519	8.89019	BW10	rs15498366
1	170874164	8.89019	BW10	rs315787653
1	170874203	8.89019	BW10	rs314387715
1	170874367	8.7883	BW10	rs317593649
1	170874604	8.799	BW10	rs316395836
1	170874651	8.799	BW10	rs15498370
1	170874724	8.799	BW10	rs15498371
1	170876780	8.89019	BW10	rs314647559
1	170877328	8.89019	BW10	rs315419773
1	170878220	8.89019	BW10	rs313374140
1	170878835	8.89019	BW10	rs315096007
1	170879387	8.89019	BW10	rs315572242
1	170908301	10.984	BW10	rs312321230
1	170908325	10.984	BW10	rs316475742
1	170917580	8.31698	BW10	rs14917149
1	170920862	8.23348	BW10	rs312795777
1	170922258	10.525	BW10	rs317915761
1	170923979	8.40773	BW10	rs15498457
1	170926098	12.9697	BW10	rs315506234
1	170926202	11.4926	BW10	rs732398250
1	170926223	11.4926	BW10	rs316119888
1	170928331	8.70695	BW10	rs312526435
1	170930631	12.2252	BW10	rs15498473
1	170951872	9.70311	BW10	rs316357510
1	170953136	10.3653	BW10	rs317737699
1	170953402	10.3653	BW10	rs315233289
1	170953703	10.3653	BW10	rs314251540
1	170953844	10.3653	BW10	rs731380754
1	170954022	10.3653	BW10	rs318166780
1	170954886	10.3653	BW10	rs315057142
1	170958478	9.90769	BW10	rs316959205
1	170958562	9.90769	BW10	rs313640831
1	170958629	10.3907	BW10	rs732302734
1	170958630	9.85758	BW10	rs737087670
1	170958784	9.85758	BW10	rs15498555
1	170959057	9.84821	BW10	rs314833461
1	170959264	8.98101	BW10	rs317793952
1	171002552	9.41251	BW10	rs313699839
1	171008784	11.6619	BW10	rs13553157
1	171118038	9.90252	BW10	rs733565828
1	171119678	8.91863	BW10	rs731205078
1	171359576	8.36995	BW10	rs318234165
1	171360360	8.95393	BW10	rs316810079
1	171361108	8.55545	BW10	rs14917562
1	171362312	8.69283	BW10	rs739453838
1	171362332	11.5131	BW10	rs317452353
1	171362899	11.2508	BW10	rs314672161
1	171363838	8.2448	BW10	rs316518983
1	171364773	11.2327	BW10	rs735397162
1	171364818	11.2327	BW10	rs740186183
1	171364979	11.1107	BW10	rs317428859
1	171365568	11.9602	BW10	rs314632905
1	171365606	11.9602	BW10	rs312472304
1	171365672	11.8765	BW10	rs317277727
1	171365933	9.1252	BW10	rs14917569
1	171366142	8.61486	BW10	rs736126168
1	171367250	8.67021	BW10	rs316791704
1	171368403	8.55007	BW10	rs316753679
1	171371184	12.241	BW10	rs315629676
1	171371609	8.55545	BW10	rs314240826
1	171371723	11.6843	BW10	rs315865825
1	171372194	8.67021	BW10	rs314395988
1	171372373	11.9251	BW10	rs316780267
1	171377836	11.4115	BW10	rs314053757
1	171381835	8.56888	BW10	rs741337409
1	171388476	8.68963	BW10	rs13553334
1	171403666	9.72502	BW10	rs315125235
1	171404041	11.8475	BW10
1	171405102	8.87953	BW10	rs317415475
1	171407699	9.61555	BW10	rs736162997
1	171411019	15.7142	BW10	rs316877904
1	171412017	9.21868	BW10	rs14917638
1	171420331	9.06595	BW10	rs313719925
1	171422635	9.58828	BW10	rs313132938
1	171426647	8.34546	BW10	rs315995692
1	171464516	10.6651	BW10	rs314672135
1	171465702	9.223	BW10	rs316864061
1	171465954	10.4963	BW10	rs314456099
1	171466993	10.6651	BW10	rs312509054
1	171467115	10.6651	BW10	rs314827173
1	171468296	10.7123	BW10	rs312736578
1	171469538	10.0229	BW10	rs736575089
1	171469602	10.5789	BW10	rs730970292
1	171473238	9.45576	BW10	rs13553401
1	171473336	10.0644	BW10	rs13553402
1	171487576	9.13135	BW10	rs318080543
1	171487868	9.76673	BW10	rs315645105
1	171489039	10.2628	BW10	rs315869490
1	171515600	8.74345	BW10	rs314095399
1	171515735	8.30821	BW10	rs312570957
1	171517763	9.7169	BW10	rs731190844
1	171577203	9.49974	BW10	rs15500126
1	171577225	9.49974	BW10	rs15500128
1	171604746	9.75971	BW10	rs739271258
1	171604784	9.56601	BW10	rs733175010
1	171604813	9.5087	BW10	rs315191503
1	171611653	8.44545	BW10	rs314098918
1	171611698	8.63157	BW10	rs312898009
1	171624646	9.01167	BW10	rs15500375
1	171624672	8.73158	BW10	rs15500376
1	171624691	8.80908	BW10	rs312555154
1	171625129	10.6419	BW10	rs315907094
1	171636763	9.38728	BW10	rs318136400
1	171638398	9.77171	BW10	rs316724410
1	171677914	9.31699	BW10	rs730956794
1	171710979	11.956	BW10	rs739449011
1	171812912	8.61658	BW10	rs314876934
1	171855424	9.02139	BW10	rs312459650
1	171855780	9.02139	BW10	rs741759991
1	171855814	9.22245	BW10	rs738861504
1	171855863	9.02139	BW10	rs731361645
1	171856012	9.02139	BW10	rs736140408
1	171856525	9.02139	BW10	rs15501200
1	171857892	9.02139	BW10	rs738979866
1	171862866	9.22245	BW10	rs15501212
1	171862880	9.22245	BW10	rs15501214
1	171863318	9.22245	BW10	rs732650175
1	171863444	8.30461	BW10	rs313468188
1	171863825	9.02139	BW10	rs735718910
1	171867661	9.02139	BW10	rs733174408
1	171871837	9.02139	BW10	rs736412312
1	171872088	8.81883	BW10	rs741675199
1	171872095	8.7379	BW10	rs737505894
1	171872879	9.02139	BW10	rs735878135
1	171873853	9.02139	BW10
1	171907512	8.28912	BW10	rs316769937
1	171925611	11.8609	BW10	rs313969005
1	171925771	12.3499	BW10	rs314313907
1	171926127	12.1796	BW10	rs741616644
1	171926492	10.4861	BW10	rs15501348
1	171926496	10.3255	BW10	rs14918165
1	171926520	10.829	BW10	rs15501350
1	171999917	8.83962	BW10	rs732915857
1	172154625	8.19943	BW10	rs313082042
1	172158628	8.84212	BW10	rs312437604
1	172159377	8.19943	BW10	rs735502708
1	172159867	8.3795	BW10	rs313217617
1	172160297	8.19943	BW10	rs317855961
1	172160677	8.37036	BW10	rs314953709
1	172161491	8.42275	BW10	rs731442333
1	172161585	8.22352	BW10	rs14918493
1	172164642	8.58282	BW10	rs732251593
1	172388918	8.56282	BW10	rs313016000
4	74526009	8.25368	BW10	rs13774694
1	168979017	8.32972	BW11	rs314629230
1	168979802	9.29248	BW11	rs315867914
1	169494619	8.40077	BW11	rs317980129
1	169494623	8.40077	BW11	rs316427369
1	170375053	8.30017	BW11	rs15497312
1	170398020	9.96134	BW11	rs737505340
1	170406320	9.49319	BW11	rs315641964
1	170438243	9.11735	BW11	rs312952736
1	170438265	8.80616	BW11	rs314820317
1	170438598	9.96439	BW11	rs313341750
1	170440890	9.76527	BW11	rs15497492
1	170455128	8.71329	BW11	rs317434637
1	170458425	9.05491	BW11	rs15497545
1	170474308	9.39658	BW11	rs318226750
1	170474438	8.63138	BW11	rs15497619
1	170474613	8.63138	BW11	rs13971733
1	170474619	8.88836	BW11	rs13971734
1	170477202	8.76874	BW11	rs13971739
1	170479300	8.95726	BW11	rs313239675
1	170480253	8.76874	BW11	rs14916610
1	170481204	8.57948	BW11	rs312497291
1	170515622	8.91486	BW11	rs730992520
1	170516190	8.53757	BW11	rs14916666
1	170518663	8.69203	BW11	rs316179053
1	170520555	8.55029	BW11	rs314804026
1	170539789	9.49577	BW11	rs794667586
1	170543105	9.21288	BW11	rs14916708
1	170546067	9.43225	BW11	rs316248999
1	170546724	9.54882	BW11	rs313892299
1	170546735	9.25544	BW11	rs317941918
1	170546742	9.25544	BW11	rs737254161
1	170548074	11.4942	BW11	rs734149332
1	170548895	11.4761	BW11	rs313664704
1	170550073	8.82505	BW11	rs736980172
1	170550988	8.58626	BW11	rs317879889
1	170551108	8.85511	BW11	rs313936052
1	170551522	8.5048	BW11	rs313323023
1	170553291	8.95137	BW11	rs13971848
1	170556031	8.5248	BW11	rs739259113
1	170558172	8.41961	BW11	rs731096753
1	170565846	8.64667	BW11	rs736349122
1	170567202	8.78361	BW11	rs317550941
1	170567220	8.70176	BW11	rs315986232
1	170567580	10.5038	BW11	rs315775996
1	170567686	10.6601	BW11	rs313337558
1	170567689	10.6601	BW11	rs739979678
1	170567964	8.48093	BW11	rs13971858
1	170568065	8.48093	BW11	rs13971859
1	170568112	8.29874	BW11	rs13971860
1	170568136	8.24038	BW11	rs13971861
1	170572223	8.80673	BW11	rs313184016
1	170572408	9.44602	BW11	rs739944425
1	170572411	9.44602	BW11	rs732439638
1	170572413	9.44602	BW11	rs735967012
1	170578675	9.30148	BW11	rs737235196
1	170578680	9.5524	BW11	rs732460163
1	170578685	9.26793	BW11	rs734537674
1	170579298	8.53757	BW11	rs15497824
1	170595311	8.33113	BW11	rs431854369
1	170606359	11.1474	BW11	rs317953773
1	170611223	8.63387	BW11	rs314814283
1	170622546	8.35736	BW11	rs315549548
1	170627217	8.80002	BW11	rs317882491
1	170627281	9.48073	BW11	rs315996566
1	170629592	8.95654	BW11	rs312509936
1	170633067	8.59733	BW11	rs314989414
1	170633850	12.9192	BW11	rs13971985
1	170644209	8.55009	BW11	rs15497939
1	170644560	10.4706	BW11	rs735268334
1	170648963	8.65853	BW11	rs314348443
1	170649438	9.11339	BW11	rs314045327
1	170650738	8.92969	BW11
1	170651190	11.2127	BW11	rs740529018
1	170653354	8.54671	BW11	rs14916856
1	170667840	8.44756	BW11	rs735688494
1	170673670	9.8168	BW11	rs734750566
1	170678600	11.4565	BW11	rs15497991
1	170681240	8.94658	BW11	rs317476696
1	170681654	8.61398	BW11	rs316188363
1	170713988	13.4959	BW11	rs315503200
1	170714148	13.4959	BW11	rs736315237
1	170714730	10.0635	BW11	rs316120475
1	170715097	12.7973	BW11
1	170742770	11.1244	BW11	rs731599186
1	170743966	13.426	BW11	rs731822485
1	170768292	8.96711	BW11	rs794561797
1	170770493	10.1335	BW11	rs740421329
1	170770675	8.90029	BW11	rs734364020
1	170771115	8.98156	BW11	rs14917032
1	170771256	8.81316	BW11	rs314299772
1	170771418	8.81316	BW11	rs318159491
1	170771629	13.5863	BW11	rs316186152
1	170772052	11.9383	BW11	rs734312108
1	170772684	8.35751	BW11	rs313425081
1	170773444	8.70668	BW11	rs312375628
1	170781966	9.7377	BW11	rs313411095
1	170828026	8.58317	BW11	rs314264811
1	170828087	8.58317	BW11	rs15498292
1	170872752	8.35241	BW11	rs312384305
1	170873519	8.35241	BW11	rs15498366
1	170874164	8.35241	BW11	rs315787653
1	170874203	8.35241	BW11	rs314387715
1	170874604	8.37608	BW11	rs316395836
1	170874651	8.37608	BW11	rs15498370
1	170874724	8.37608	BW11	rs15498371
1	170876780	8.35241	BW11	rs314647559
1	170877328	8.35241	BW11	rs315419773
1	170878220	8.35241	BW11	rs313374140
1	170878835	8.35241	BW11	rs315096007
1	170879387	8.35241	BW11	rs315572242
1	170886487	8.6699	BW11	rs739916643
1	170908301	13.5399	BW11	rs312321230
1	170908325	13.5399	BW11	rs316475742
1	170917580	10.7276	BW11	rs14917149
1	170920862	8.94694	BW11	rs312795777
1	170922258	11.5521	BW11	rs317915761
1	170923979	9.21845	BW11	rs15498457
1	170926098	15.5358	BW11	rs315506234
1	170926202	13.9769	BW11	rs732398250
1	170926223	13.9769	BW11	rs316119888
1	170928331	9.46945	BW11	rs312526435
1	170930631	14.7148	BW11	rs15498473
1	170944075	9.13734	BW11	rs736547049
1	170946989	10.2181	BW11	rs314833405
1	170951872	11.726	BW11	rs316357510
1	170953136	12.4761	BW11	rs317737699
1	170953402	12.4761	BW11	rs315233289
1	170953703	12.4761	BW11	rs314251540
1	170953844	12.4761	BW11	rs731380754
1	170954022	12.4761	BW11	rs318166780
1	170954886	12.4761	BW11	rs315057142
1	170958478	10.5589	BW11	rs316959205
1	170958562	10.5589	BW11	rs313640831
1	170958629	12.5391	BW11	rs732302734
1	170958630	10.5663	BW11	rs737087670
1	170958784	10.5663	BW11	rs15498555
1	170959057	11.6915	BW11	rs314833461
1	170959264	9.59454	BW11	rs317793952
1	170961399	8.31192	BW11	rs318096684
1	170976486	8.37048	BW11	rs316360395
1	171002552	10.0328	BW11	rs313699839
1	171008784	11.5723	BW11	rs13553157
1	171018782	8.34695	BW11	rs313191717
1	171118038	11.1606	BW11	rs733565828
1	171119678	9.38513	BW11	rs731205078
1	171124801	8.26013	BW11	rs15498848
1	171124831	8.26013	BW11	rs15498850
1	171359576	8.96665	BW11	rs318234165
1	171360360	9.65685	BW11	rs316810079
1	171361108	9.00577	BW11	rs14917562
1	171362312	9.35466	BW11	rs739453838
1	171362332	12.9809	BW11	rs317452353
1	171362899	12.2327	BW11	rs314672161
1	171363838	8.72715	BW11	rs316518983
1	171363875	8.61518	BW11	rs313420301
1	171364773	11.755	BW11	rs735397162
1	171364818	11.755	BW11	rs740186183
1	171364979	11.7026	BW11	rs317428859
1	171365382	8.54794	BW11	rs314219238
1	171365568	12.3474	BW11	rs314632905
1	171365606	12.3474	BW11	rs312472304
1	171365672	12.7938	BW11	rs317277727
1	171365933	9.52766	BW11	rs14917569
1	171366142	9.28351	BW11	rs736126168
1	171367250	9.22165	BW11	rs316791704
1	171367370	8.46141	BW11	rs315632035
1	171367777	8.37232	BW11	rs315660102
1	171367878	8.43511	BW11	rs312882764
1	171368171	8.67344	BW11	rs731453989
1	171368403	8.9977	BW11	rs316753679
1	171368666	8.65461	BW11	rs315802589
1	171368862	8.54267	BW11	rs315987387
1	171369015	8.68137	BW11	rs739904538
1	171370119	8.54099	BW11	rs315692162
1	171371184	12.3007	BW11	rs315629676
1	171371609	9.00577	BW11	rs314240826
1	171371723	12.2245	BW11	rs315865825
1	171372194	9.22165	BW11	rs314395988
1	171372373	12.3487	BW11	rs316780267
1	171376636	8.21785	BW11	rs13972630
1	171377280	8.40245	BW11	rs316756324
1	171377836	12.3298	BW11	rs314053757
1	171381129	8.25592	BW11	rs314657294
1	171381835	9.25875	BW11	rs741337409
1	171386987	8.28441	BW11	rs15499448
1	171388476	9.87218	BW11	rs13553334
1	171403666	9.52836	BW11	rs315125235
1	171404041	12.1139	BW11
1	171405102	10.117	BW11	rs317415475
1	171407699	10.3323	BW11	rs736162997
1	171411019	17.9342	BW11	rs316877904
1	171412017	10.7378	BW11	rs14917638
1	171413086	8.27702	BW11	rs315767128
1	171414809	8.49382	BW11	rs317398879
1	171420331	9.27063	BW11	rs313719925
1	171422635	9.77453	BW11	rs313132938
1	171432804	8.80334	BW11	rs733196830
1	171433202	8.80334	BW11
1	171433213	8.80334	BW11	rs733761687
1	171434527	8.43732	BW11	rs734169755
1	171434678	8.28953	BW11
1	171434700	8.28953	BW11
1	171434742	8.80334	BW11
1	171434782	8.28953	BW11	rs793976110
1	171434923	8.80334	BW11	rs733248352
1	171435060	8.80334	BW11
1	171435231	8.80334	BW11	rs739980081
1	171435265	8.80334	BW11	rs737179815
1	171440959	8.45893	BW11	rs738350161
1	171442503	8.55415	BW11
1	171442974	8.75353	BW11
1	171452607	8.21545	BW11	rs316188937
1	171464516	11.5421	BW11	rs314672135
1	171465702	9.23304	BW11	rs316864061
1	171465954	11.539	BW11	rs314456099
1	171466993	11.7373	BW11	rs312509054
1	171467115	11.7373	BW11	rs314827173
1	171468296	11.273	BW11	rs312736578
1	171469538	10.826	BW11	rs736575089
1	171469602	11.6494	BW11	rs730970292
1	171473229	8.81648	BW11	rs13553400
1	171473238	9.3681	BW11	rs13553401
1	171473336	10.0179	BW11	rs13553402
1	171487576	11.1091	BW11	rs318080543
1	171487868	11.8752	BW11	rs315645105
1	171489039	12.5713	BW11	rs315869490
1	171489566	9.06382	BW11	rs733384594
1	171489591	9.06382	BW11	rs736802197
1	171489732	8.59043	BW11	rs738735339
1	171515600	10.2426	BW11	rs314095399
1	171515735	9.54032	BW11	rs312570957
1	171517763	11.9241	BW11	rs731190844
1	171519244	8.31728	BW11	rs736808236
1	171542629	8.41844	BW11	rs15499968
1	171577203	10.3659	BW11	rs15500126
1	171577225	10.3659	BW11	rs15500128
1	171604746	10.5006	BW11	rs739271258
1	171604784	10.4193	BW11	rs733175010
1	171604813	10.4073	BW11	rs315191503
1	171608846	8.25526	BW11	rs736960097
1	171611653	9.37008	BW11	rs314098918
1	171611698	9.67882	BW11	rs312898009
1	171620555	8.9465	BW11	rs317326086
1	171624646	9.92543	BW11	rs15500375
1	171624672	9.75643	BW11	rs15500376
1	171624691	9.94174	BW11	rs312555154
1	171625129	12.4998	BW11	rs315907094
1	171630380	9.38588	BW11	rs733045622
1	171633458	9.75742	BW11	rs739241822
1	171634452	8.49202	BW11	rs317679606
1	171636763	9.74557	BW11	rs318136400
1	171637568	8.6111	BW11	rs733870676
1	171638398	10.4776	BW11	rs316724410
1	171641584	8.3666	BW11	rs312430041
1	171645389	8.34142	BW11	rs314336960
1	171657362	8.34142	BW11	rs15500465
1	171657424	8.34142	BW11	rs15500467
1	171677914	10.0601	BW11	rs730956794
1	171695646	8.52105	BW11	rs316051711
1	171696414	9.23699	BW11	rs15500616
1	171702670	8.29971	BW11	rs314730771
1	171702819	8.45288	BW11	rs315747420
1	171710979	13.7972	BW11	rs739449011
1	171713490	8.56515	BW11	rs734816965
1	171812912	8.49034	BW11	rs314876934
1	171855424	10.0764	BW11	rs312459650
1	171855780	10.0764	BW11	rs741759991
1	171855814	10.4169	BW11	rs738861504
1	171855863	10.0764	BW11	rs731361645
1	171856012	10.0764	BW11	rs736140408
1	171856341	8.52043	BW11	rs15501199
1	171856525	10.0764	BW11	rs15501200
1	171857808	8.29739	BW11	rs312275429
1	171857892	10.0764	BW11	rs738979866
1	171857900	8.99487	BW11	rs314440909
1	171859719	8.22604	BW11	rs14918083
1	171859726	8.25231	BW11	rs14918084
1	171860061	8.27894	BW11	rs315101183
1	171860117	8.75715	BW11	rs314260364
1	171860517	8.75715	BW11	rs733947271
1	171860561	8.75715	BW11	rs738712998
1	171860656	8.3388	BW11	rs739229442
1	171861049	8.75715	BW11	rs13973485
1	171861405	8.3388	BW11	rs313318719
1	171862866	10.4169	BW11	rs15501212
1	171862880	10.4169	BW11	rs15501214
1	171863318	10.4169	BW11	rs732650175
1	171863444	8.91994	BW11	rs313468188
1	171863825	10.0764	BW11	rs735718910
1	171864184	9.19251	BW11	rs315982032
1	171866088	8.29739	BW11	rs313889285
1	171867661	10.0764	BW11	rs733174408
1	171868610	8.75715	BW11	rs317141456
1	171868614	8.75715	BW11	rs314918755
1	171868867	8.75715	BW11	rs736015132
1	171868928	8.75715	BW11	rs314289428
1	171870997	9.07618	BW11
1	171871020	8.9598	BW11	rs734688534
1	171871255	8.53119	BW11	rs312939265
1	171871317	8.75715	BW11	rs14918128
1	171871581	8.75715	BW11	rs317984512
1	171871837	10.0764	BW11	rs736412312
1	171872088	9.32625	BW11	rs741675199
1	171872095	9.15588	BW11	rs737505894
1	171872879	10.0764	BW11	rs735878135
1	171873853	10.0764	BW11
1	171874053	8.60099	BW11	rs738735869
1	171905739	8.71222	BW11	rs732273136
1	171907512	9.21726	BW11	rs316769937
1	171907706	9.11113	BW11	rs737625086
1	171911018	9.18157	BW11	rs313913830
1	171925611	13.5787	BW11	rs313969005
1	171925771	14.2931	BW11	rs314313907
1	171926127	13.6735	BW11	rs741616644
1	171926492	11.879	BW11	rs15501348
1	171926496	11.731	BW11	rs14918165
1	171926520	12.3984	BW11	rs15501350
1	171942297	8.58112	BW11	rs14918177
1	171969173	8.52886	BW11	rs14918187
1	171989884	8.65221	BW11	rs738721310
1	171992062	8.65221	BW11	rs739758362
1	171992349	8.65221	BW11	rs740409794
1	171993152	9.65427	BW11	rs313542789
1	171993404	9.65095	BW11	rs15501576
1	171993919	8.86509	BW11	rs14918205
1	171994053	9.63291	BW11	rs14918206
1	171995684	8.65221	BW11	rs738370061
1	171997359	8.33911	BW11	rs315294438
1	171998571	8.53282	BW11	rs739824965
1	171998648	8.65221	BW11	rs735083255
1	171999130	8.65221	BW11	rs738042876
1	171999917	10.1189	BW11	rs732915857
1	172000345	9.19101	BW11	rs312318959
1	172001909	8.88515	BW11	rs15501602
1	172047911	8.99579	BW11	rs314527800
1	172060023	8.49154	BW11	rs13973669
1	172060055	8.49154	BW11	rs314933545
1	172081850	9.12364	BW11	rs731265008
1	172082229	9.48113	BW11	rs13553685
1	172093287	8.37828	BW11	rs15501901
1	172095912	8.88315	BW11	rs732864571
1	172096764	9.16981	BW11	rs737990005
1	172101339	8.37495	BW11	rs15501941
1	172154625	9.19758	BW11	rs313082042
1	172155770	8.76905	BW11	rs13973774
1	172158628	9.7875	BW11	rs312437604
1	172159377	9.19758	BW11	rs735502708
1	172159867	9.29138	BW11	rs313217617
1	172160188	8.94276	BW11	rs736702241
1	172160190	8.98653	BW11	rs740135836
1	172160297	9.19758	BW11	rs317855961
1	172160677	9.39522	BW11	rs314953709
1	172161061	9.06845	BW11	rs15502111
1	172161491	9.43645	BW11	rs731442333
1	172161585	8.35035	BW11	rs14918493
1	172161794	8.99099	BW11	rs15502113
1	172164642	9.61124	BW11	rs732251593
1	172246004	8.35513	BW11	rs731234714
1	172258749	8.65955	BW11	rs741751999
1	172270908	8.3249	BW11	rs735313384
1	172271030	8.23007	BW11	rs1058893547
1	172271034	8.23007	BW11	rs1059388434
1	172309304	8.37331	BW11	rs312867806
1	172309337	8.37331	BW11	rs316241789
1	172367703	8.29914	BW11	rs14918724
1	172367718	8.29914	BW11	rs316924509
1	172370653	8.97518	BW11	rs312811650
1	172370662	8.70463	BW11	rs316303008
1	172371352	8.44373	BW11	rs13553811
1	172388918	9.10674	BW11	rs313016000
1	172558359	9.04892	BW11	rs737637228
1	172558655	9.39378	BW11	rs315137835
1	172602534	8.32568	BW11	rs312476986
1	174181828	8.26266	BW11	rs734388803
4	73375282	8.35494	BW11	rs317177671
4	73463480	8.39803	BW11	rs16434946
4	74524672	8.68056	BW11	rs312896963
4	74526009	9.11022	BW11	rs13774694
4	75111394	8.71713	BW11	rs14490855
4	75111410	8.90111	BW11	rs14490856
4	75111816	8.217	BW11	rs312590149
4	75112116	8.3939	BW11	rs313277712
4	75121285	8.55249	BW11	rs738094025
4	76049807	8.33928	BW11	rs318196131
1	168979802	6.59157e-10	BW12	rs315867914
1	169494619	2.74465e-09	BW12	rs317980129
1	169494623	2.74465e-09	BW12	rs316427369
1	170375053	2.10778e-09	BW12	rs15497312
1	170385129	3.69813e-09	BW12	rs317087180
1	170386976	4.27741e-09	BW12	rs13552916
1	170398020	7.62416e-11	BW12	rs737505340
1	170406320	6.85611e-10	BW12	rs315641964
1	170438243	6.22354e-10	BW12	rs312952736
1	170438265	1.16888e-09	BW12	rs314820317
1	170438598	5.1375e-11	BW12	rs313341750
1	170440890	6.33587e-11	BW12	rs15497492
1	170451778	5.73554e-09	BW12	rs734074929
1	170455128	3.93393e-09	BW12	rs317434637
1	170458425	4.01097e-10	BW12	rs15497545
1	170474308	3.32451e-10	BW12	rs318226750
1	170474619	3.68763e-09	BW12	rs13971734
1	170477202	2.06404e-09	BW12	rs13971739
1	170479300	7.42543e-10	BW12	rs313239675
1	170480253	2.06404e-09	BW12	rs14916610
1	170481204	2.66756e-09	BW12	rs312497291
1	170515622	3.77599e-10	BW12	rs730992520
1	170516190	2.93373e-09	BW12	rs14916666
1	170518663	7.66076e-10	BW12	rs316179053
1	170520555	4.64415e-09	BW12	rs314804026
1	170539789	1.12215e-10	BW12	rs794667586
1	170543105	2.461e-10	BW12	rs14916708
1	170546067	3.49648e-10	BW12	rs316248999
1	170546724	8.6612e-11	BW12	rs313892299
1	170546735	1.79247e-10	BW12	rs317941918
1	170546742	1.79247e-10	BW12	rs737254161
1	170548074	2.7478e-12	BW12	rs734149332
1	170548895	3.56795e-12	BW12	rs313664704
1	170549550	5.38374e-09	BW12	rs312530958
1	170550073	3.84002e-09	BW12	rs736980172
1	170550988	3.75578e-09	BW12	rs317879889
1	170551108	3.93873e-09	BW12	rs313936052
1	170551522	1.77082e-09	BW12	rs313323023
1	170553291	2.72876e-09	BW12	rs13971848
1	170558172	1.8457e-09	BW12	rs731096753
1	170565846	3.66401e-09	BW12	rs736349122
1	170567202	2.03537e-09	BW12	rs317550941
1	170567220	2.47571e-09	BW12	rs315986232
1	170567580	3.93652e-11	BW12	rs315775996
1	170567686	3.4884e-11	BW12	rs313337558
1	170567689	3.4884e-11	BW12	rs739979678
1	170567964	3.69588e-09	BW12	rs13971858
1	170568065	3.69588e-09	BW12	rs13971859
1	170568112	6.02389e-09	BW12	rs13971860
1	170572223	2.20297e-09	BW12	rs313184016
1	170572408	5.32345e-10	BW12	rs739944425
1	170572411	5.32345e-10	BW12	rs732439638
1	170572413	5.32345e-10	BW12	rs735967012
1	170578675	2.63429e-09	BW12	rs737235196
1	170578680	1.47707e-09	BW12	rs732460163
1	170578685	2.92278e-09	BW12	rs734537674
1	170579298	2.93373e-09	BW12	rs15497824
1	170590004	1.45307e-09	BW12	rs431894138
1	170595311	5.55411e-09	BW12	rs431854369
1	170606359	6.20366e-12	BW12	rs317953773
1	170611223	4.56884e-09	BW12	rs314814283
1	170622546	4.00538e-09	BW12	rs315549548
1	170627217	1.13018e-10	BW12	rs317882491
1	170627281	1.25715e-10	BW12	rs315996566
1	170629592	9.83272e-10	BW12	rs312509936
1	170633067	2.62932e-09	BW12	rs314989414
1	170633850	9.11341e-15	BW12	rs13971985
1	170644209	9.49914e-10	BW12	rs15497939
1	170644560	1.06995e-11	BW12	rs735268334
1	170648963	1.09236e-09	BW12	rs314348443
1	170649438	9.9747e-10	BW12	rs314045327
1	170650738	6.59356e-10	BW12
1	170651190	3.61479e-12	BW12	rs740529018
1	170653354	2.28707e-09	BW12	rs14916856
1	170667840	2.87389e-10	BW12	rs735688494
1	170668091	3.26921e-09	BW12
1	170668092	3.26921e-09	BW12	rs1059164199
1	170668146	1.18098e-09	BW12	rs733449154
1	170668262	3.16555e-09	BW12	rs741516078
1	170668306	3.01001e-09	BW12	rs734948089
1	170668999	5.95777e-09	BW12	rs740698825
1	170673670	1.26885e-10	BW12	rs734750566
1	170678600	4.72174e-13	BW12	rs15497991
1	170680092	6.23775e-09	BW12
1	170681240	8.13294e-10	BW12	rs317476696
1	170681654	1.30959e-09	BW12	rs316188363
1	170682439	4.45995e-09	BW12	rs731229391
1	170682559	4.45995e-09	BW12	rs733223049
1	170713988	3.92076e-16	BW12	rs315503200
1	170714148	3.92076e-16	BW12	rs736315237
1	170714529	1.77598e-09	BW12	rs313295655
1	170714730	3.24805e-11	BW12	rs316120475
1	170715097	3.28801e-15	BW12
1	170742770	3.20982e-11	BW12	rs731599186
1	170743966	1.03374e-14	BW12	rs731822485
1	170768292	5.86552e-10	BW12	rs794561797
1	170770493	6.52836e-11	BW12	rs740421329
1	170770675	8.2505e-10	BW12	rs734364020
1	170770901	4.35697e-09	BW12	rs313837198
1	170771115	3.41176e-10	BW12	rs14917032
1	170771256	4.03781e-10	BW12	rs314299772
1	170771418	4.03781e-10	BW12	rs318159491
1	170771629	5.32542e-15	BW12	rs316186152
1	170771656	4.28698e-09	BW12	rs317737445
1	170772052	5.04068e-13	BW12	rs734312108
1	170772684	6.74467e-10	BW12	rs313425081
1	170772782	9.19383e-10	BW12	rs317040077
1	170773012	1.26987e-09	BW12	rs315716859
1	170773053	1.26987e-09	BW12	rs731361302
1	170773444	1.30131e-10	BW12	rs312375628
1	170773590	4.53554e-09	BW12	rs735880975
1	170773591	4.53554e-09	BW12	rs739124428
1	170781966	6.77569e-11	BW12	rs313411095
1	170828026	6.13554e-10	BW12	rs314264811
1	170828087	6.13554e-10	BW12	rs15498292
1	170828536	1.94504e-09	BW12	rs732104358
1	170828737	1.94504e-09	BW12	rs317693735
1	170872752	1.02189e-09	BW12	rs312384305
1	170873519	1.02189e-09	BW12	rs15498366
1	170874164	1.02189e-09	BW12	rs315787653
1	170874203	1.02189e-09	BW12	rs314387715
1	170874367	1.69282e-09	BW12	rs317593649
1	170874604	1.07695e-09	BW12	rs316395836
1	170874651	1.07695e-09	BW12	rs15498370
1	170874724	1.07695e-09	BW12	rs15498371
1	170876780	1.02189e-09	BW12	rs314647559
1	170877328	1.02189e-09	BW12	rs315419773
1	170878220	1.02189e-09	BW12	rs313374140
1	170878835	1.02189e-09	BW12	rs315096007
1	170879387	1.02189e-09	BW12	rs315572242
1	170886487	5.93857e-10	BW12	rs739916643
1	170908301	3.91718e-15	BW12	rs312321230
1	170908325	3.91718e-15	BW12	rs316475742
1	170917580	1.36741e-12	BW12	rs14917149
1	170920862	2.4364e-10	BW12	rs312795777
1	170922258	2.61973e-13	BW12	rs317915761
1	170923979	1.18059e-10	BW12	rs15498457
1	170926098	9.18252e-18	BW12	rs315506234
1	170926202	2.48702e-16	BW12	rs732398250
1	170926223	2.48702e-16	BW12	rs316119888
1	170928331	6.23494e-11	BW12	rs312526435
1	170928601	1.64534e-09	BW12	rs314977954
1	170930631	4.65698e-17	BW12	rs15498473
1	170944075	1.15992e-10	BW12	rs736547049
1	170945917	6.10243e-09	BW12	rs313680268
1	170946989	6.59494e-12	BW12	rs314833405
1	170948971	3.66711e-09	BW12	rs318196804
1	170951872	2.5716e-13	BW12	rs316357510
1	170953136	3.96833e-14	BW12	rs317737699
1	170953402	3.96833e-14	BW12	rs315233289
1	170953703	3.96833e-14	BW12	rs314251540
1	170953844	3.96833e-14	BW12	rs731380754
1	170954022	3.96833e-14	BW12	rs318166780
1	170954886	3.96833e-14	BW12	rs315057142
1	170958478	7.02697e-11	BW12	rs316959205
1	170958562	7.02697e-11	BW12	rs313640831
1	170958629	3.72407e-14	BW12	rs732302734
1	170958630	7.84047e-11	BW12	rs737087670
1	170958784	7.84047e-11	BW12	rs15498555
1	170959057	1.45399e-13	BW12	rs314833461
1	170959264	6.65155e-11	BW12	rs317793952
1	170961399	1.09712e-09	BW12	rs318096684
1	170971292	1.98602e-09	BW12	rs313688404
1	170976486	7.00754e-10	BW12	rs316360395
1	171002552	3.19617e-10	BW12	rs313699839
1	171008784	3.92468e-12	BW12	rs13553157
1	171018782	1.07823e-09	BW12	rs313191717
1	171049014	5.21715e-09	BW12	rs313147790
1	171091692	3.35258e-09	BW12	rs741360664
1	171095148	2.41159e-09	BW12	rs316259520
1	171105723	3.57144e-09	BW12	rs734820885
1	171118038	1.28969e-12	BW12	rs733565828
1	171119678	9.01753e-11	BW12	rs731205078
1	171124801	1.08467e-09	BW12	rs15498848
1	171124831	1.08467e-09	BW12	rs15498850
1	171359576	4.21525e-10	BW12	rs318234165
1	171360360	1.56368e-10	BW12	rs316810079
1	171361108	5.30767e-10	BW12	rs14917562
1	171362312	2.59369e-10	BW12	rs739453838
1	171362332	3.78623e-14	BW12	rs317452353
1	171362899	1.41262e-13	BW12	rs314672161
1	171363838	8.27529e-10	BW12	rs316518983
1	171363875	1.14564e-09	BW12	rs313420301
1	171364773	9.51977e-13	BW12	rs735397162
1	171364818	9.51977e-13	BW12	rs740186183
1	171364979	9.94491e-13	BW12	rs317428859
1	171365382	1.88977e-09	BW12	rs314219238
1	171365568	2.7764e-13	BW12	rs314632905
1	171365606	2.7764e-13	BW12	rs312472304
1	171365672	8.1553e-14	BW12	rs317277727
1	171365933	1.05358e-10	BW12	rs14917569
1	171366142	2.93722e-10	BW12	rs736126168
1	171367250	2.92601e-10	BW12	rs316791704
1	171367370	2.55588e-09	BW12	rs315632035
1	171368171	7.74585e-10	BW12	rs731453989
1	171368403	5.59101e-10	BW12	rs316753679
1	171368666	1.64116e-09	BW12	rs315802589
1	171368862	4.93608e-09	BW12	rs315987387
1	171369015	1.81378e-09	BW12	rs739904538
1	171371184	1.94783e-13	BW12	rs315629676
1	171371609	5.30767e-10	BW12	rs314240826
1	171371723	5.19116e-13	BW12	rs315865825
1	171372194	2.92601e-10	BW12	rs314395988
1	171372373	2.30196e-13	BW12	rs316780267
1	171372840	5.73749e-09	BW12	rs731719077
1	171377836	3.99683e-13	BW12	rs314053757
1	171381129	2.22723e-09	BW12	rs314657294
1	171381835	1.42857e-10	BW12	rs741337409
1	171386987	6.42411e-10	BW12	rs15499448
1	171388476	3.24491e-11	BW12	rs13553334
1	171388998	1.86478e-09	BW12	rs738804394
1	171403666	1.09549e-10	BW12	rs315125235
1	171404041	5.2368e-14	BW12
1	171404805	4.58352e-09	BW12
1	171405102	6.28748e-11	BW12	rs317415475
1	171407699	2.68194e-11	BW12	rs736162997
1	171411019	8.47769e-19	BW12	rs316877904
1	171412017	1.48582e-11	BW12	rs14917638
1	171414809	3.7403e-09	BW12	rs317398879
1	171420331	4.58593e-10	BW12	rs313719925
1	171422635	1.58857e-10	BW12	rs313132938
1	171423241	4.36256e-09	BW12	rs739700769
1	171426647	2.31392e-09	BW12	rs315995692
1	171432804	6.04112e-10	BW12	rs733196830
1	171433202	6.04112e-10	BW12
1	171433213	6.04112e-10	BW12	rs733761687
1	171434527	5.06264e-09	BW12	rs734169755
1	171434742	6.04112e-10	BW12
1	171434923	6.04112e-10	BW12	rs733248352
1	171435060	6.04112e-10	BW12
1	171435231	6.04112e-10	BW12	rs739980081
1	171435265	6.04112e-10	BW12	rs737179815
1	171440959	1.63934e-09	BW12	rs738350161
1	171442503	1.19022e-09	BW12
1	171442974	5.84883e-10	BW12
1	171452607	2.83858e-09	BW12	rs316188937
1	171461195	2.5819e-09	BW12	rs313197010
1	171464516	5.52193e-13	BW12	rs314672135
1	171465702	1.7059e-10	BW12	rs316864061
1	171465954	4.67931e-13	BW12	rs314456099
1	171466993	2.89221e-13	BW12	rs312509054
1	171467115	2.89221e-13	BW12	rs314827173
1	171468296	1.1053e-12	BW12	rs312736578
1	171469538	2.63389e-12	BW12	rs736575089
1	171469602	4.09362e-13	BW12	rs730970292
1	171473229	2.44426e-09	BW12	rs13553400
1	171473238	1.51667e-10	BW12	rs13553401
1	171473336	3.14079e-11	BW12	rs13553402
1	171487576	4.59171e-12	BW12	rs318080543
1	171487868	6.49466e-13	BW12	rs315645105
1	171489039	1.3182e-13	BW12	rs315869490
1	171489566	1.23659e-09	BW12	rs733384594
1	171489591	1.23659e-09	BW12	rs736802197
1	171489732	2.87549e-09	BW12	rs738735339
1	171515600	2.52071e-11	BW12	rs314095399
1	171515735	1.0742e-10	BW12	rs312570957
1	171517763	4.63433e-13	BW12	rs731190844
1	171519244	5.30616e-09	BW12	rs736808236
1	171519569	6.12378e-09	BW12	rs314340587
1	171577203	2.18269e-11	BW12	rs15500126
1	171577225	2.18269e-11	BW12	rs15500128
1	171590077	2.34398e-09	BW12	rs13972999
1	171604746	1.73409e-11	BW12	rs739271258
1	171604784	1.40957e-11	BW12	rs733175010
1	171604813	1.1778e-11	BW12	rs315191503
1	171608846	2.67688e-09	BW12	rs736960097
1	171611653	4.67766e-10	BW12	rs314098918
1	171611698	2.28313e-10	BW12	rs312898009
1	171620555	1.052e-09	BW12	rs317326086
1	171624646	5.69055e-11	BW12	rs15500375
1	171624672	6.76231e-11	BW12	rs15500376
1	171624691	3.9918e-11	BW12	rs312555154
1	171625129	9.03704e-14	BW12	rs315907094
1	171625647	3.97539e-09	BW12	rs732405877
1	171630380	6.94972e-11	BW12	rs733045622
1	171633458	5.56745e-11	BW12	rs739241822
1	171634452	1.73679e-10	BW12	rs317679606
1	171636364	3.30296e-09	BW12	rs315209253
1	171636763	2.03092e-11	BW12	rs318136400
1	171637568	2.66097e-10	BW12	rs733870676
1	171638398	2.2807e-12	BW12	rs316724410
1	171641584	1.32332e-09	BW12	rs312430041
1	171645389	2.92197e-10	BW12	rs314336960
1	171657362	2.92197e-10	BW12	rs15500465
1	171657424	2.92197e-10	BW12	rs15500467
1	171677914	9.25476e-12	BW12	rs730956794
1	171695646	5.16007e-09	BW12	rs316051711
1	171696414	1.54732e-09	BW12	rs15500616
1	171698163	4.07379e-09	BW12	rs312984801
1	171699261	2.42654e-09	BW12	rs734670427
1	171702670	2.53526e-09	BW12	rs314730771
1	171702819	2.39409e-09	BW12	rs315747420
1	171710979	2.30759e-15	BW12	rs739449011
1	171713490	2.76896e-09	BW12	rs734816965
1	171812912	4.07129e-10	BW12	rs314876934
1	171855424	1.25865e-11	BW12	rs312459650
1	171855780	1.25865e-11	BW12	rs741759991
1	171855814	5.53088e-12	BW12	rs738861504
1	171855863	1.25865e-11	BW12	rs731361645
1	171856012	1.25865e-11	BW12	rs736140408
1	171856341	9.45101e-10	BW12	rs15501199
1	171856525	1.25865e-11	BW12	rs15501200
1	171857808	1.47794e-09	BW12	rs312275429
1	171857892	1.25865e-11	BW12	rs738979866
1	171857900	7.44774e-10	BW12	rs314440909
1	171859719	5.9077e-09	BW12	rs14918083
1	171859726	5.09153e-09	BW12	rs14918084
1	171860061	1.61675e-09	BW12	rs315101183
1	171860117	5.36469e-10	BW12	rs314260364
1	171860200	3.45771e-09	BW12	rs316427183
1	171860517	5.36469e-10	BW12	rs733947271
1	171860561	5.36469e-10	BW12	rs738712998
1	171860656	4.65781e-09	BW12	rs739229442
1	171861049	5.36469e-10	BW12	rs13973485
1	171861405	4.65781e-09	BW12	rs313318719
1	171862866	5.53088e-12	BW12	rs15501212
1	171862880	5.53088e-12	BW12	rs15501214
1	171863318	5.53088e-12	BW12	rs732650175
1	171863444	3.37829e-10	BW12	rs313468188
1	171863825	1.25865e-11	BW12	rs735718910
1	171864184	5.55043e-10	BW12	rs315982032
1	171866088	1.47794e-09	BW12	rs313889285
1	171867661	1.25865e-11	BW12	rs733174408
1	171868610	5.36469e-10	BW12	rs317141456
1	171868614	5.36469e-10	BW12	rs314918755
1	171868867	5.36469e-10	BW12	rs736015132
1	171868928	5.36469e-10	BW12	rs314289428
1	171870997	9.91096e-11	BW12
1	171871020	1.25303e-10	BW12	rs734688534
1	171871103	5.8085e-09	BW12	rs14918126
1	171871255	7.0958e-10	BW12	rs312939265
1	171871317	5.36469e-10	BW12	rs14918128
1	171871581	5.36469e-10	BW12	rs317984512
1	171871837	1.25865e-11	BW12	rs736412312
1	171872088	4.26567e-11	BW12	rs741675199
1	171872095	4.96982e-11	BW12	rs737505894
1	171872879	1.25865e-11	BW12	rs735878135
1	171873853	1.25865e-11	BW12
1	171874053	2.26287e-09	BW12	rs738735869
1	171905026	3.30902e-09	BW12	rs312453820
1	171905665	2.22802e-09	BW12	rs314611924
1	171905739	2.95945e-10	BW12	rs732273136
1	171906127	5.40403e-09	BW12	rs317018912
1	171906488	2.47338e-09	BW12	rs316051873
1	171907512	6.23812e-10	BW12	rs316769937
1	171907706	6.62611e-10	BW12	rs737625086
1	171911018	6.71308e-10	BW12	rs313913830
1	171925611	6.39404e-15	BW12	rs313969005
1	171925771	9.33323e-16	BW12	rs314313907
1	171926127	7.37016e-15	BW12	rs741616644
1	171926492	3.95206e-13	BW12	rs15501348
1	171926496	4.77058e-13	BW12	rs14918165
1	171926520	1.18322e-13	BW12	rs15501350
1	171927170	2.13123e-09	BW12	rs15501354
1	171928557	2.13123e-09	BW12	rs313470197
1	171928675	2.13123e-09	BW12	rs318034120
1	171942114	3.00868e-09	BW12	rs13553633
1	171942297	3.22555e-09	BW12	rs14918177
1	171969173	2.51816e-09	BW12	rs14918187
1	171989884	4.83996e-09	BW12	rs738721310
1	171992062	4.83996e-09	BW12	rs739758362
1	171992349	4.83996e-09	BW12	rs740409794
1	171993152	3.00256e-10	BW12	rs313542789
1	171993404	2.7528e-10	BW12	rs15501576
1	171993919	4.95311e-09	BW12	rs14918205
1	171994053	2.70866e-10	BW12	rs14918206
1	171995684	4.83996e-09	BW12	rs738370061
1	171997359	5.44521e-09	BW12	rs315294438
1	171998648	4.83996e-09	BW12	rs735083255
1	171999130	4.83996e-09	BW12	rs738042876
1	171999917	1.17741e-10	BW12	rs732915857
1	172000345	1.37021e-09	BW12	rs312318959
1	172001909	1.62074e-09	BW12	rs15501602
1	172047911	2.24468e-09	BW12	rs314527800
1	172081850	1.6352e-09	BW12	rs731265008
1	172082229	4.08832e-10	BW12	rs13553685
1	172083547	6.01829e-09	BW12	rs317813154
1	172084437	6.01829e-09	BW12	rs732224722
1	172095912	3.5703e-09	BW12	rs732864571
1	172096764	6.14976e-10	BW12	rs737990005
1	172101339	3.05496e-09	BW12	rs15501941
1	172154625	4.23673e-10	BW12	rs313082042
1	172155770	1.30725e-09	BW12	rs13973774
1	172158628	1.35162e-10	BW12	rs312437604
1	172159377	4.23673e-10	BW12	rs735502708
1	172159867	3.61305e-10	BW12	rs313217617
1	172160188	9.79488e-10	BW12	rs736702241
1	172160190	7.91561e-10	BW12	rs740135836
1	172160297	4.23673e-10	BW12	rs317855961
1	172160677	2.37815e-10	BW12	rs314953709
1	172161061	4.60433e-10	BW12	rs15502111
1	172161491	1.88023e-10	BW12	rs731442333
1	172161585	1.29963e-09	BW12	rs14918493
1	172161794	6.61204e-10	BW12	rs15502113
1	172164642	2.63644e-10	BW12	rs732251593
1	172245245	5.08422e-09	BW12	rs737644989
1	172246004	4.19704e-09	BW12	rs731234714
1	172246069	5.08422e-09	BW12	rs735976541
1	172361777	5.73888e-09	BW12	rs14918710
1	172363089	5.98519e-09	BW12	rs14918713
1	172363148	5.33896e-09	BW12	rs317130359
1	172367703	5.40073e-09	BW12	rs14918724
1	172367718	5.40073e-09	BW12	rs316924509
1	172369466	2.36626e-09	BW12	rs735841697
1	172370653	5.62401e-09	BW12	rs312811650
1	172371352	3.43435e-09	BW12	rs13553811
1	172382758	1.57359e-09	BW12	rs317811986
1	172388918	1.77859e-10	BW12	rs313016000
1	172558359	2.84957e-09	BW12	rs737637228
1	172558655	5.07816e-10	BW12	rs315137835
1	172602534	4.37929e-09	BW12	rs312476986
1	172656083	3.82048e-09	BW12	rs14918911
1	174181828	1.55479e-09	BW12	rs734388803
1	175059708	5.21013e-09	BW12	rs15509277
4	73373138	2.54527e-09	BW12	rs13816551
4	73375282	1.8912e-09	BW12	rs317177671
4	73463480	2.54484e-09	BW12	rs16434946
4	74524672	1.16521e-09	BW12	rs312896963
4	74526009	3.5431e-10	BW12	rs13774694
4	74566607	1.77456e-09	BW12	rs312475924
4	75110352	2.29429e-09	BW12	rs314169301
4	75111394	1.0539e-09	BW12	rs14490855
4	75111410	8.85362e-10	BW12	rs14490856
4	75111816	2.05869e-09	BW12	rs312590149
4	75112116	1.11428e-09	BW12	rs313277712
4	75121285	8.76908e-10	BW12	rs738094025
4	76049807	5.24085e-09	BW12	rs318196131
