# Supplementary material for: Genome-Wide Association Study and Selective Sweep Analysis Reveal the Genetic Architecture of Body Weights in a Chicken F2 Resource Population
Source: Front Vet Sci. 2022 Jul 26;9:875454. doi: 10.3389/fvets.2022.875454 (PMC9361851; doi:10.3389/fvets.2022.875454)
Supplement: Supplementary file 3 [file Table_3.XLSX]

## Sheet: Sheet1
Table S3. Windows with the top 5% FST and log2 (θπ ratio) values simultaneously, which were considered as the selective sweeps for BW1 - BW12.
CHROM	BIN_START	BIN_END	Trait
1	1930001	1970000	BW12
1	1940001	1980000	BW12
1	2120001	2160000	BW12
1	9640001	9680000	BW12
1	9650001	9690000	BW12
1	9660001	9700000	BW12
1	9670001	9710000	BW12
1	17140001	17180000	BW12
1	17150001	17190000	BW12
1	28020001	28060000	BW12
1	28030001	28070000	BW12
1	30940001	30980000	BW12
1	39240001	39280000	BW12
1	40640001	40680000	BW12
1	40650001	40690000	BW12
1	41820001	41860000	BW12
1	41830001	41870000	BW12
1	41840001	41880000	BW12
1	164910001	164950000	BW12
1	164920001	164960000	BW12
1	164930001	164970000	BW12
1	164940001	164980000	BW12
1	164960001	165000000	BW12
1	169500001	169540000	BW12
1	169510001	169550000	BW12
1	169520001	169560000	BW12
1	169720001	169760000	BW12
1	169730001	169770000	BW12
1	170180001	170220000	BW12
1	170190001	170230000	BW12
1	170200001	170240000	BW12
1	170210001	170250000	BW12
1	170220001	170260000	BW12
1	170450001	170490000	BW12
1	170460001	170500000	BW12
1	170470001	170510000	BW12
1	170480001	170520000	BW12
1	170890001	170930000	BW12
1	170900001	170940000	BW12
1	170910001	170950000	BW12
1	170920001	170960000	BW12
1	170930001	170970000	BW12
1	170940001	170980000	BW12
1	170950001	170990000	BW12
1	170960001	171000000	BW12
1	170970001	171010000	BW12
1	170980001	171020000	BW12
1	170990001	171030000	BW12
1	171000001	171040000	BW12
1	171010001	171050000	BW12
1	171020001	171060000	BW12
1	171030001	171070000	BW12
1	171040001	171080000	BW12
1	171050001	171090000	BW12
1	171170001	171210000	BW12
1	171180001	171220000	BW12
1	171330001	171370000	BW12
1	171480001	171520000	BW12
1	171900001	171940000	BW12
1	171910001	171950000	BW12
1	172530001	172570000	BW12
1	172540001	172580000	BW12
1	172550001	172590000	BW12
1	172560001	172600000	BW12
1	172570001	172610000	BW12
1	172620001	172660000	BW12
1	172790001	172830000	BW12
1	172940001	172980000	BW12
1	172950001	172990000	BW12
1	173110001	173150000	BW12
1	173120001	173160000	BW12
1	173660001	173700000	BW12
1	174150001	174190000	BW12
1	174160001	174200000	BW12
1	174170001	174210000	BW12
1	174180001	174220000	BW12
1	174460001	174500000	BW12
1	174520001	174560000	BW12
1	174590001	174630000	BW12
1	174600001	174640000	BW12
1	174610001	174650000	BW12
1	174620001	174660000	BW12
1	174630001	174670000	BW12
1	174640001	174680000	BW12
1	174650001	174690000	BW12
1	174660001	174700000	BW12
1	174670001	174710000	BW12
1	174680001	174720000	BW12
1	174690001	174730000	BW12
1	174800001	174840000	BW12
1	174810001	174850000	BW12
1	174910001	174950000	BW12
1	174920001	174960000	BW12
1	175070001	175110000	BW12
1	175080001	175120000	BW12
1	175170001	175210000	BW12
1	175180001	175220000	BW12
1	175190001	175230000	BW12
1	175200001	175240000	BW12
1	175350001	175390000	BW12
1	175360001	175400000	BW12
1	175380001	175420000	BW12
1	175620001	175660000	BW12
1	175630001	175670000	BW12
1	175640001	175680000	BW12
1	175650001	175690000	BW12
1	175750001	175790000	BW12
1	175760001	175800000	BW12
1	175770001	175810000	BW12
1	175950001	175990000	BW12
1	175960001	176000000	BW12
1	175970001	176010000	BW12
1	176000001	176040000	BW12
1	176010001	176050000	BW12
1	176050001	176090000	BW12
1	176060001	176100000	BW12
1	176070001	176110000	BW12
1	176080001	176120000	BW12
1	176090001	176130000	BW12
1	176100001	176140000	BW12
1	176110001	176150000	BW12
1	176120001	176160000	BW12
1	176130001	176170000	BW12
1	176140001	176180000	BW12
1	176150001	176190000	BW12
1	176160001	176200000	BW12
1	176170001	176210000	BW12
1	176180001	176220000	BW12
1	176190001	176230000	BW12
1	176200001	176240000	BW12
1	176210001	176250000	BW12
1	176220001	176260000	BW12
1	176230001	176270000	BW12
1	176240001	176280000	BW12
1	176250001	176290000	BW12
1	176260001	176300000	BW12
1	176270001	176310000	BW12
1	176280001	176320000	BW12
1	176290001	176330000	BW12
1	176300001	176340000	BW12
1	176310001	176350000	BW12
1	176320001	176360000	BW12
1	176330001	176370000	BW12
1	176340001	176380000	BW12
1	176390001	176430000	BW12
1	176400001	176440000	BW12
1	176410001	176450000	BW12
1	176420001	176460000	BW12
1	176430001	176470000	BW12
1	176440001	176480000	BW12
1	176450001	176490000	BW12
1	176460001	176500000	BW12
1	176470001	176510000	BW12
1	176480001	176520000	BW12
1	176490001	176530000	BW12
1	176500001	176540000	BW12
1	176510001	176550000	BW12
1	176520001	176560000	BW12
1	176530001	176570000	BW12
1	176540001	176580000	BW12
1	176550001	176590000	BW12
1	176560001	176600000	BW12
1	176570001	176610000	BW12
1	176580001	176620000	BW12
1	176590001	176630000	BW12
1	176600001	176640000	BW12
1	176610001	176650000	BW12
1	176620001	176660000	BW12
1	176630001	176670000	BW12
1	176640001	176680000	BW12
1	176650001	176690000	BW12
1	176660001	176700000	BW12
1	176670001	176710000	BW12
1	176680001	176720000	BW12
1	176690001	176730000	BW12
1	176980001	177020000	BW12
1	176990001	177030000	BW12
1	177000001	177040000	BW12
1	177010001	177050000	BW12
1	177020001	177060000	BW12
1	177100001	177140000	BW12
1	177110001	177150000	BW12
1	177120001	177160000	BW12
1	177130001	177170000	BW12
1	177140001	177180000	BW12
1	177150001	177190000	BW12
1	177160001	177200000	BW12
1	177170001	177210000	BW12
1	177190001	177230000	BW12
1	177200001	177240000	BW12
1	177210001	177250000	BW12
1	177220001	177260000	BW12
1	177230001	177270000	BW12
1	177240001	177280000	BW12
1	177250001	177290000	BW12
1	177260001	177300000	BW12
1	177370001	177410000	BW12
1	177380001	177420000	BW12
1	177390001	177430000	BW12
1	177400001	177440000	BW12
1	177410001	177450000	BW12
1	177420001	177460000	BW12
1	177430001	177470000	BW12
1	177440001	177480000	BW12
1	177450001	177490000	BW12
1	177460001	177500000	BW12
1	177480001	177520000	BW12
1	177490001	177530000	BW12
1	177500001	177540000	BW12
1	177550001	177590000	BW12
1	177560001	177600000	BW12
1	177570001	177610000	BW12
1	177580001	177620000	BW12
1	177590001	177630000	BW12
1	177600001	177640000	BW12
1	177610001	177650000	BW12
1	177620001	177660000	BW12
1	177670001	177710000	BW12
1	177810001	177850000	BW12
1	177820001	177860000	BW12
1	179730001	179770000	BW12
1	179740001	179780000	BW12
1	179910001	179950000	BW12
1	183240001	183280000	BW12
1	183250001	183290000	BW12
1	183260001	183300000	BW12
1	184510001	184550000	BW12
1	184520001	184560000	BW12
1	184530001	184570000	BW12
1	184540001	184580000	BW12
1	184550001	184590000	BW12
1	184560001	184600000	BW12
1	184570001	184610000	BW12
1	184710001	184750000	BW12
1	184720001	184760000	BW12
1	187380001	187420000	BW12
1	187390001	187430000	BW12
1	187400001	187440000	BW12
1	187410001	187450000	BW12
1	187420001	187460000	BW12
1	187750001	187790000	BW12
1	187760001	187800000	BW12
1	187770001	187810000	BW12
1	188830001	188870000	BW12
1	193410001	193450000	BW12
1	193420001	193460000	BW12
1	4700001	4740000	BW12
1	4710001	4750000	BW12
1	10110001	10150000	BW12
1	10120001	10160000	BW12
1	10130001	10170000	BW12
1	10140001	10180000	BW12
1	14040001	14080000	BW12
1	14050001	14090000	BW12
1	14060001	14100000	BW12
1	14070001	14110000	BW12
1	14080001	14120000	BW12
1	14090001	14130000	BW12
1	14100001	14140000	BW12
1	14390001	14430000	BW12
1	14450001	14490000	BW12
1	14460001	14500000	BW12
1	14470001	14510000	BW12
1	14500001	14540000	BW12
1	14830001	14870000	BW12
1	14840001	14880000	BW12
1	15580001	15620000	BW12
1	15590001	15630000	BW12
1	15620001	15660000	BW12
1	15630001	15670000	BW12
1	15640001	15680000	BW12
1	18710001	18750000	BW12
1	18720001	18760000	BW12
1	18730001	18770000	BW12
1	22700001	22740000	BW12
1	27550001	27590000	BW12
1	27560001	27600000	BW12
1	27990001	28030000	BW12
1	28340001	28380000	BW12
1	28350001	28390000	BW12
1	28360001	28400000	BW12
1	28370001	28410000	BW12
1	28380001	28420000	BW12
1	28430001	28470000	BW12
1	28800001	28840000	BW12
1	28810001	28850000	BW12
1	29990001	30030000	BW12
1	31370001	31410000	BW12
1	31380001	31420000	BW12
1	31820001	31860000	BW12
1	31830001	31870000	BW12
1	31880001	31920000	BW12
1	31890001	31930000	BW12
1	32370001	32410000	BW12
1	33230001	33270000	BW12
1	33240001	33280000	BW12
1	33250001	33290000	BW12
1	34280001	34320000	BW12
1	34290001	34330000	BW12
1	34300001	34340000	BW12
1	34310001	34350000	BW12
1	34500001	34540000	BW12
1	34510001	34550000	BW12
1	34520001	34560000	BW12
1	34530001	34570000	BW12
1	34700001	34740000	BW12
1	34710001	34750000	BW12
1	34720001	34760000	BW12
1	34750001	34790000	BW12
1	34950001	34990000	BW12
1	34960001	35000000	BW12
1	34970001	35010000	BW12
1	34980001	35020000	BW12
1	34990001	35030000	BW12
1	35000001	35040000	BW12
1	35010001	35050000	BW12
1	35020001	35060000	BW12
1	35030001	35070000	BW12
1	35280001	35320000	BW12
1	35290001	35330000	BW12
1	35300001	35340000	BW12
1	35570001	35610000	BW12
1	35580001	35620000	BW12
1	35590001	35630000	BW12
1	35690001	35730000	BW12
1	35700001	35740000	BW12
1	35710001	35750000	BW12
1	35720001	35760000	BW12
1	35730001	35770000	BW12
1	35740001	35780000	BW12
1	35880001	35920000	BW12
1	35890001	35930000	BW12
1	35900001	35940000	BW12
1	36110001	36150000	BW12
1	36120001	36160000	BW12
1	36130001	36170000	BW12
1	36140001	36180000	BW12
1	36150001	36190000	BW12
1	36200001	36240000	BW12
1	36210001	36250000	BW12
1	36220001	36260000	BW12
1	36230001	36270000	BW12
1	36390001	36430000	BW12
1	36400001	36440000	BW12
1	36410001	36450000	BW12
1	36420001	36460000	BW12
1	36430001	36470000	BW12
1	36440001	36480000	BW12
1	36450001	36490000	BW12
1	36530001	36570000	BW12
1	36550001	36590000	BW12
1	36680001	36720000	BW12
1	36690001	36730000	BW12
1	36700001	36740000	BW12
1	36710001	36750000	BW12
1	36730001	36770000	BW12
1	36740001	36780000	BW12
1	36760001	36800000	BW12
1	36840001	36880000	BW12
1	36890001	36930000	BW12
1	36900001	36940000	BW12
1	37050001	37090000	BW12
1	37110001	37150000	BW12
1	37120001	37160000	BW12
1	37130001	37170000	BW12
1	37140001	37180000	BW12
1	37240001	37280000	BW12
1	37260001	37300000	BW12
1	37270001	37310000	BW12
1	37280001	37320000	BW12
1	37290001	37330000	BW12
1	37300001	37340000	BW12
1	37410001	37450000	BW12
1	37420001	37460000	BW12
1	37480001	37520000	BW12
1	37490001	37530000	BW12
1	37500001	37540000	BW12
1	37540001	37580000	BW12
1	37550001	37590000	BW12
1	37560001	37600000	BW12
1	37570001	37610000	BW12
1	37580001	37620000	BW12
1	37590001	37630000	BW12
1	37600001	37640000	BW12
1	37610001	37650000	BW12
1	37620001	37660000	BW12
1	37630001	37670000	BW12
1	37670001	37710000	BW12
1	37680001	37720000	BW12
1	37740001	37780000	BW12
1	37750001	37790000	BW12
1	37760001	37800000	BW12
1	37800001	37840000	BW12
1	38030001	38070000	BW12
1	38040001	38080000	BW12
1	38050001	38090000	BW12
1	38060001	38100000	BW12
1	38110001	38150000	BW12
1	38120001	38160000	BW12
1	38130001	38170000	BW12
1	38140001	38180000	BW12
1	38150001	38190000	BW12
1	38250001	38290000	BW12
1	38260001	38300000	BW12
1	38310001	38350000	BW12
1	38320001	38360000	BW12
1	38330001	38370000	BW12
1	38350001	38390000	BW12
1	38360001	38400000	BW12
1	38370001	38410000	BW12
1	38380001	38420000	BW12
1	38460001	38500000	BW12
1	38470001	38510000	BW12
1	38480001	38520000	BW12
1	38490001	38530000	BW12
1	38500001	38540000	BW12
1	38510001	38550000	BW12
1	38520001	38560000	BW12
1	38530001	38570000	BW12
1	38540001	38580000	BW12
1	38550001	38590000	BW12
1	38620001	38660000	BW12
1	38630001	38670000	BW12
1	38660001	38700000	BW12
1	38670001	38710000	BW12
1	38680001	38720000	BW12
1	38690001	38730000	BW12
1	38700001	38740000	BW12
1	38710001	38750000	BW12
1	38750001	38790000	BW12
1	38760001	38800000	BW12
1	38770001	38810000	BW12
1	38780001	38820000	BW12
1	38790001	38830000	BW12
1	38800001	38840000	BW12
1	38820001	38860000	BW12
1	38830001	38870000	BW12
1	38840001	38880000	BW12
1	38850001	38890000	BW12
1	38860001	38900000	BW12
1	38870001	38910000	BW12
1	38960001	39000000	BW12
1	38970001	39010000	BW12
1	38980001	39020000	BW12
1	39280001	39320000	BW12
1	39290001	39330000	BW12
1	39300001	39340000	BW12
1	39310001	39350000	BW12
1	39350001	39390000	BW12
1	39360001	39400000	BW12
1	39370001	39410000	BW12
1	39380001	39420000	BW12
1	39450001	39490000	BW12
1	39460001	39500000	BW12
1	39490001	39530000	BW12
1	39500001	39540000	BW12
1	39510001	39550000	BW12
1	39550001	39590000	BW12
1	39560001	39600000	BW12
1	39620001	39660000	BW12
1	39630001	39670000	BW12
1	39640001	39680000	BW12
1	39680001	39720000	BW12
1	39690001	39730000	BW12
1	39700001	39740000	BW12
1	39710001	39750000	BW12
1	39720001	39760000	BW12
1	39730001	39770000	BW12
1	39740001	39780000	BW12
1	39750001	39790000	BW12
1	39760001	39800000	BW12
1	39770001	39810000	BW12
1	39780001	39820000	BW12
1	39790001	39830000	BW12
1	39800001	39840000	BW12
1	39810001	39850000	BW12
1	39820001	39860000	BW12
1	39830001	39870000	BW12
1	39840001	39880000	BW12
1	39850001	39890000	BW12
1	39860001	39900000	BW12
1	39870001	39910000	BW12
1	39880001	39920000	BW12
1	39890001	39930000	BW12
1	39900001	39940000	BW12
1	39910001	39950000	BW12
1	39970001	40010000	BW12
1	39980001	40020000	BW12
1	40030001	40070000	BW12
1	40040001	40080000	BW12
1	40050001	40090000	BW12
1	40060001	40100000	BW12
1	40070001	40110000	BW12
1	40080001	40120000	BW12
1	40090001	40130000	BW12
1	40110001	40150000	BW12
1	40200001	40240000	BW12
1	40210001	40250000	BW12
1	40220001	40260000	BW12
1	40230001	40270000	BW12
1	40240001	40280000	BW12
1	40740001	40780000	BW12
1	40750001	40790000	BW12
1	40760001	40800000	BW12
1	40770001	40810000	BW12
1	40780001	40820000	BW12
1	40800001	40840000	BW12
1	40810001	40850000	BW12
1	40820001	40860000	BW12
1	40830001	40870000	BW12
1	40840001	40880000	BW12
1	40850001	40890000	BW12
1	41010001	41050000	BW12
1	41020001	41060000	BW12
1	41030001	41070000	BW12
1	41080001	41120000	BW12
1	41320001	41360000	BW12
1	41330001	41370000	BW12
1	41350001	41390000	BW12
1	41360001	41400000	BW12
1	41370001	41410000	BW12
1	41380001	41420000	BW12
1	41390001	41430000	BW12
1	41400001	41440000	BW12
1	41420001	41460000	BW12
1	41430001	41470000	BW12
1	41440001	41480000	BW12
1	41450001	41490000	BW12
1	41460001	41500000	BW12
1	41480001	41520000	BW12
1	41490001	41530000	BW12
1	41500001	41540000	BW12
1	41510001	41550000	BW12
1	41520001	41560000	BW12
1	41530001	41570000	BW12
1	41540001	41580000	BW12
1	41550001	41590000	BW12
1	41880001	41920000	BW12
1	41890001	41930000	BW12
1	42080001	42120000	BW12
1	42090001	42130000	BW12
1	42100001	42140000	BW12
1	42110001	42150000	BW12
1	42120001	42160000	BW12
1	42130001	42170000	BW12
1	42140001	42180000	BW12
1	42560001	42600000	BW12
1	42570001	42610000	BW12
1	42580001	42620000	BW12
1	42590001	42630000	BW12
1	42600001	42640000	BW12
1	42610001	42650000	BW12
1	42640001	42680000	BW12
1	42650001	42690000	BW12
1	42660001	42700000	BW12
1	42670001	42710000	BW12
1	42680001	42720000	BW12
1	42690001	42730000	BW12
1	42700001	42740000	BW12
1	42710001	42750000	BW12
1	42720001	42760000	BW12
1	42730001	42770000	BW12
1	42740001	42780000	BW12
1	42750001	42790000	BW12
1	42760001	42800000	BW12
1	42770001	42810000	BW12
1	42910001	42950000	BW12
1	42920001	42960000	BW12
1	42930001	42970000	BW12
1	42940001	42980000	BW12
1	42950001	42990000	BW12
1	42960001	43000000	BW12
1	43180001	43220000	BW12
1	43190001	43230000	BW12
1	43200001	43240000	BW12
1	43210001	43250000	BW12
1	43220001	43260000	BW12
1	43230001	43270000	BW12
1	43240001	43280000	BW12
1	43250001	43290000	BW12
1	43260001	43300000	BW12
1	43270001	43310000	BW12
1	43280001	43320000	BW12
1	43290001	43330000	BW12
1	43340001	43380000	BW12
1	43350001	43390000	BW12
1	43370001	43410000	BW12
1	43380001	43420000	BW12
1	43390001	43430000	BW12
1	43400001	43440000	BW12
1	43410001	43450000	BW12
1	43420001	43460000	BW12
1	43430001	43470000	BW12
1	43440001	43480000	BW12
1	43450001	43490000	BW12
1	43460001	43500000	BW12
1	43470001	43510000	BW12
1	43480001	43520000	BW12
1	43490001	43530000	BW12
1	43500001	43540000	BW12
1	43600001	43640000	BW12
1	43610001	43650000	BW12
1	43620001	43660000	BW12
1	43630001	43670000	BW12
1	43640001	43680000	BW12
1	43660001	43700000	BW12
1	43680001	43720000	BW12
1	43690001	43730000	BW12
1	43700001	43740000	BW12
1	43900001	43940000	BW12
1	43910001	43950000	BW12
1	43930001	43970000	BW12
1	43940001	43980000	BW12
1	43950001	43990000	BW12
1	43960001	44000000	BW12
1	43970001	44010000	BW12
1	43980001	44020000	BW12
1	43990001	44030000	BW12
1	44000001	44040000	BW12
1	44010001	44050000	BW12
1	44020001	44060000	BW12
1	44040001	44080000	BW12
1	44050001	44090000	BW12
1	44060001	44100000	BW12
1	44070001	44110000	BW12
1	44140001	44180000	BW12
1	44150001	44190000	BW12
1	44160001	44200000	BW12
1	44220001	44260000	BW12
1	44230001	44270000	BW12
1	44240001	44280000	BW12
1	44250001	44290000	BW12
1	44260001	44300000	BW12
1	44390001	44430000	BW12
1	44400001	44440000	BW12
1	44410001	44450000	BW12
1	44420001	44460000	BW12
1	44430001	44470000	BW12
1	44440001	44480000	BW12
1	54390001	54430000	BW12
1	55010001	55050000	BW12
1	55020001	55060000	BW12
1	55030001	55070000	BW12
1	55040001	55080000	BW12
1	55100001	55140000	BW12
1	55450001	55490000	BW12
1	96750001	96790000	BW12
1	96760001	96800000	BW12
1	96770001	96810000	BW12
1	96780001	96820000	BW12
1	96790001	96830000	BW12
1	96800001	96840000	BW12
1	166120001	166160000	BW12
1	168910001	168950000	BW12
1	168920001	168960000	BW12
1	169230001	169270000	BW12
1	169260001	169300000	BW12
1	169270001	169310000	BW12
1	169280001	169320000	BW12
1	169370001	169410000	BW12
1	171260001	171300000	BW12
1	171860001	171900000	BW12
1	171980001	172020000	BW12
1	171990001	172030000	BW12
1	172000001	172040000	BW12
1	172010001	172050000	BW12
1	172020001	172060000	BW12
1	172030001	172070000	BW12
1	172040001	172080000	BW12
1	172050001	172090000	BW12
1	172060001	172100000	BW12
1	172070001	172110000	BW12
1	172080001	172120000	BW12
1	172090001	172130000	BW12
1	172100001	172140000	BW12
1	172110001	172150000	BW12
1	172120001	172160000	BW12
1	172130001	172170000	BW12
1	172140001	172180000	BW12
1	172150001	172190000	BW12
1	172160001	172200000	BW12
1	172170001	172210000	BW12
1	172180001	172220000	BW12
1	172190001	172230000	BW12
1	172200001	172240000	BW12
1	172210001	172250000	BW12
1	172220001	172260000	BW12
1	172230001	172270000	BW12
1	172250001	172290000	BW12
1	172260001	172300000	BW12
1	172270001	172310000	BW12
1	172280001	172320000	BW12
1	172290001	172330000	BW12
1	172300001	172340000	BW12
1	172310001	172350000	BW12
1	172320001	172360000	BW12
1	172330001	172370000	BW12
1	172340001	172380000	BW12
1	172350001	172390000	BW12
1	172360001	172400000	BW12
1	172370001	172410000	BW12
1	172830001	172870000	BW12
1	172840001	172880000	BW12
1	173780001	173820000	BW12
1	173790001	173830000	BW12
1	173800001	173840000	BW12
1	173810001	173850000	BW12
1	173820001	173860000	BW12
1	174210001	174250000	BW12
1	174220001	174260000	BW12
1	174230001	174270000	BW12
1	174240001	174280000	BW12
1	174250001	174290000	BW12
1	174260001	174300000	BW12
1	174270001	174310000	BW12
1	174280001	174320000	BW12
1	174290001	174330000	BW12
1	174300001	174340000	BW12
1	174310001	174350000	BW12
1	174320001	174360000	BW12
1	174560001	174600000	BW12
1	174870001	174910000	BW12
1	174880001	174920000	BW12
1	175280001	175320000	BW12
1	175290001	175330000	BW12
1	176720001	176760000	BW12
1	179520001	179560000	BW12
1	180560001	180600000	BW12
1	180570001	180610000	BW12
1	180580001	180620000	BW12
1	180610001	180650000	BW12
1	180620001	180660000	BW12
1	180730001	180770000	BW12
1	180740001	180780000	BW12
1	180750001	180790000	BW12
1	180820001	180860000	BW12
1	180830001	180870000	BW12
1	180840001	180880000	BW12
1	180850001	180890000	BW12
1	184420001	184460000	BW12
1	184430001	184470000	BW12
1	184860001	184900000	BW12
1	184870001	184910000	BW12
1	184880001	184920000	BW12
1	184890001	184930000	BW12
1	184900001	184940000	BW12
1	184910001	184950000	BW12
1	184920001	184960000	BW12
1	184930001	184970000	BW12
1	184940001	184980000	BW12
1	185850001	185890000	BW12
1	185860001	185900000	BW12
1	186560001	186600000	BW12
1	192130001	192170000	BW12
1	192140001	192180000	BW12
1	192150001	192190000	BW12
1	192160001	192200000	BW12
1	192260001	192300000	BW12
1	192270001	192310000	BW12
1	192280001	192320000	BW12
1	192290001	192330000	BW12
1	10100001	10140000	BW11
1	10110001	10150000	BW11
1	10120001	10160000	BW11
1	10130001	10170000	BW11
1	14040001	14080000	BW11
1	14050001	14090000	BW11
1	14060001	14100000	BW11
1	14070001	14110000	BW11
1	14080001	14120000	BW11
1	15620001	15660000	BW11
1	15630001	15670000	BW11
1	15640001	15680000	BW11
1	20040001	20080000	BW11
1	20050001	20090000	BW11
1	20060001	20100000	BW11
1	34290001	34330000	BW11
1	34300001	34340000	BW11
1	34310001	34350000	BW11
1	34510001	34550000	BW11
1	34520001	34560000	BW11
1	34530001	34570000	BW11
1	34950001	34990000	BW11
1	34960001	35000000	BW11
1	34970001	35010000	BW11
1	34980001	35020000	BW11
1	34990001	35030000	BW11
1	35000001	35040000	BW11
1	35010001	35050000	BW11
1	35710001	35750000	BW11
1	36120001	36160000	BW11
1	36230001	36270000	BW11
1	36410001	36450000	BW11
1	36420001	36460000	BW11
1	36430001	36470000	BW11
1	36440001	36480000	BW11
1	36670001	36710000	BW11
1	36680001	36720000	BW11
1	36690001	36730000	BW11
1	36700001	36740000	BW11
1	36710001	36750000	BW11
1	36730001	36770000	BW11
1	36830001	36870000	BW11
1	36840001	36880000	BW11
1	36850001	36890000	BW11
1	36890001	36930000	BW11
1	36900001	36940000	BW11
1	37110001	37150000	BW11
1	37120001	37160000	BW11
1	37130001	37170000	BW11
1	37260001	37300000	BW11
1	37270001	37310000	BW11
1	37280001	37320000	BW11
1	37290001	37330000	BW11
1	37300001	37340000	BW11
1	37310001	37350000	BW11
1	37320001	37360000	BW11
1	37410001	37450000	BW11
1	37420001	37460000	BW11
1	37480001	37520000	BW11
1	37490001	37530000	BW11
1	37500001	37540000	BW11
1	37510001	37550000	BW11
1	37520001	37560000	BW11
1	37530001	37570000	BW11
1	37540001	37580000	BW11
1	37550001	37590000	BW11
1	37560001	37600000	BW11
1	37570001	37610000	BW11
1	37580001	37620000	BW11
1	37590001	37630000	BW11
1	37600001	37640000	BW11
1	37610001	37650000	BW11
1	37620001	37660000	BW11
1	37630001	37670000	BW11
1	37640001	37680000	BW11
1	37650001	37690000	BW11
1	37660001	37700000	BW11
1	37670001	37710000	BW11
1	37680001	37720000	BW11
1	37690001	37730000	BW11
1	37720001	37760000	BW11
1	37730001	37770000	BW11
1	37740001	37780000	BW11
1	37750001	37790000	BW11
1	37760001	37800000	BW11
1	37770001	37810000	BW11
1	37780001	37820000	BW11
1	37790001	37830000	BW11
1	37800001	37840000	BW11
1	37810001	37850000	BW11
1	37820001	37860000	BW11
1	38020001	38060000	BW11
1	38030001	38070000	BW11
1	38040001	38080000	BW11
1	38050001	38090000	BW11
1	38100001	38140000	BW11
1	38110001	38150000	BW11
1	38120001	38160000	BW11
1	38130001	38170000	BW11
1	38140001	38180000	BW11
1	38150001	38190000	BW11
1	38170001	38210000	BW11
1	38180001	38220000	BW11
1	38250001	38290000	BW11
1	38260001	38300000	BW11
1	38290001	38330000	BW11
1	38310001	38350000	BW11
1	38320001	38360000	BW11
1	38330001	38370000	BW11
1	38350001	38390000	BW11
1	38360001	38400000	BW11
1	38370001	38410000	BW11
1	38380001	38420000	BW11
1	38390001	38430000	BW11
1	38410001	38450000	BW11
1	38420001	38460000	BW11
1	38480001	38520000	BW11
1	38490001	38530000	BW11
1	38500001	38540000	BW11
1	38510001	38550000	BW11
1	38520001	38560000	BW11
1	38530001	38570000	BW11
1	38540001	38580000	BW11
1	38550001	38590000	BW11
1	38560001	38600000	BW11
1	38570001	38610000	BW11
1	38680001	38720000	BW11
1	38690001	38730000	BW11
1	38700001	38740000	BW11
1	38710001	38750000	BW11
1	38740001	38780000	BW11
1	38750001	38790000	BW11
1	38760001	38800000	BW11
1	38770001	38810000	BW11
1	38790001	38830000	BW11
1	38800001	38840000	BW11
1	38820001	38860000	BW11
1	38830001	38870000	BW11
1	38850001	38890000	BW11
1	38860001	38900000	BW11
1	38880001	38920000	BW11
1	38890001	38930000	BW11
1	38940001	38980000	BW11
1	38950001	38990000	BW11
1	38960001	39000000	BW11
1	38970001	39010000	BW11
1	38980001	39020000	BW11
1	39040001	39080000	BW11
1	39280001	39320000	BW11
1	39290001	39330000	BW11
1	39300001	39340000	BW11
1	39310001	39350000	BW11
1	39360001	39400000	BW11
1	39370001	39410000	BW11
1	39440001	39480000	BW11
1	39450001	39490000	BW11
1	39490001	39530000	BW11
1	39500001	39540000	BW11
1	39510001	39550000	BW11
1	39540001	39580000	BW11
1	39550001	39590000	BW11
1	39560001	39600000	BW11
1	39570001	39610000	BW11
1	39610001	39650000	BW11
1	39620001	39660000	BW11
1	39630001	39670000	BW11
1	39640001	39680000	BW11
1	39650001	39690000	BW11
1	39660001	39700000	BW11
1	39670001	39710000	BW11
1	39690001	39730000	BW11
1	39700001	39740000	BW11
1	39710001	39750000	BW11
1	39720001	39760000	BW11
1	39730001	39770000	BW11
1	39760001	39800000	BW11
1	39770001	39810000	BW11
1	39780001	39820000	BW11
1	39790001	39830000	BW11
1	39800001	39840000	BW11
1	39810001	39850000	BW11
1	39820001	39860000	BW11
1	39830001	39870000	BW11
1	39840001	39880000	BW11
1	39850001	39890000	BW11
1	39860001	39900000	BW11
1	40040001	40080000	BW11
1	40050001	40090000	BW11
1	40060001	40100000	BW11
1	40070001	40110000	BW11
1	40080001	40120000	BW11
1	40090001	40130000	BW11
1	40100001	40140000	BW11
1	40110001	40150000	BW11
1	41320001	41360000	BW11
1	41330001	41370000	BW11
1	41370001	41410000	BW11
1	41380001	41420000	BW11
1	41390001	41430000	BW11
1	41400001	41440000	BW11
1	41420001	41460000	BW11
1	41430001	41470000	BW11
1	41440001	41480000	BW11
1	41450001	41490000	BW11
1	41460001	41500000	BW11
1	41480001	41520000	BW11
1	41490001	41530000	BW11
1	41500001	41540000	BW11
1	41510001	41550000	BW11
1	41520001	41560000	BW11
1	41530001	41570000	BW11
1	41540001	41580000	BW11
1	41550001	41590000	BW11
1	41880001	41920000	BW11
1	41890001	41930000	BW11
1	42090001	42130000	BW11
1	42110001	42150000	BW11
1	42120001	42160000	BW11
1	42560001	42600000	BW11
1	42570001	42610000	BW11
1	42580001	42620000	BW11
1	42590001	42630000	BW11
1	42600001	42640000	BW11
1	42610001	42650000	BW11
1	42620001	42660000	BW11
1	42630001	42670000	BW11
1	42640001	42680000	BW11
1	42650001	42690000	BW11
1	42660001	42700000	BW11
1	42670001	42710000	BW11
1	42710001	42750000	BW11
1	42720001	42760000	BW11
1	42730001	42770000	BW11
1	42740001	42780000	BW11
1	42750001	42790000	BW11
1	42770001	42810000	BW11
1	42910001	42950000	BW11
1	42920001	42960000	BW11
1	42930001	42970000	BW11
1	42940001	42980000	BW11
1	42950001	42990000	BW11
1	42960001	43000000	BW11
1	43190001	43230000	BW11
1	43200001	43240000	BW11
1	43210001	43250000	BW11
1	43220001	43260000	BW11
1	43230001	43270000	BW11
1	43280001	43320000	BW11
1	43290001	43330000	BW11
1	43380001	43420000	BW11
1	43470001	43510000	BW11
1	43500001	43540000	BW11
1	43620001	43660000	BW11
1	43950001	43990000	BW11
1	43960001	44000000	BW11
1	43970001	44010000	BW11
1	43980001	44020000	BW11
1	43990001	44030000	BW11
1	44000001	44040000	BW11
1	44010001	44050000	BW11
1	44060001	44100000	BW11
1	44070001	44110000	BW11
1	44150001	44190000	BW11
1	47270001	47310000	BW11
1	141150001	141190000	BW11
1	143340001	143380000	BW11
1	143350001	143390000	BW11
1	143360001	143400000	BW11
1	148690001	148730000	BW11
1	148970001	149010000	BW11
1	148980001	149020000	BW11
1	149810001	149850000	BW11
1	149820001	149860000	BW11
1	149830001	149870000	BW11
1	149840001	149880000	BW11
1	149850001	149890000	BW11
1	149860001	149900000	BW11
1	149870001	149910000	BW11
1	149880001	149920000	BW11
1	149890001	149930000	BW11
1	149900001	149940000	BW11
1	149910001	149950000	BW11
1	149920001	149960000	BW11
1	150780001	150820000	BW11
1	150790001	150830000	BW11
1	150800001	150840000	BW11
1	160160001	160200000	BW11
1	160170001	160210000	BW11
1	160180001	160220000	BW11
1	160190001	160230000	BW11
1	160200001	160240000	BW11
1	160210001	160250000	BW11
1	160220001	160260000	BW11
1	160230001	160270000	BW11
1	160240001	160280000	BW11
1	163080001	163120000	BW11
1	164980001	165020000	BW11
1	164990001	165030000	BW11
1	165000001	165040000	BW11
1	165020001	165060000	BW11
1	165030001	165070000	BW11
1	165040001	165080000	BW11
1	165330001	165370000	BW11
1	165340001	165380000	BW11
1	165350001	165390000	BW11
1	165360001	165400000	BW11
1	165370001	165410000	BW11
1	165380001	165420000	BW11
1	165390001	165430000	BW11
1	166100001	166140000	BW11
1	166110001	166150000	BW11
1	166120001	166160000	BW11
1	167900001	167940000	BW11
1	167910001	167950000	BW11
1	168070001	168110000	BW11
1	168080001	168120000	BW11
1	169250001	169290000	BW11
1	169260001	169300000	BW11
1	169270001	169310000	BW11
1	169280001	169320000	BW11
1	171250001	171290000	BW11
1	171260001	171300000	BW11
1	171270001	171310000	BW11
1	171980001	172020000	BW11
1	171990001	172030000	BW11
1	172000001	172040000	BW11
1	172010001	172050000	BW11
1	172020001	172060000	BW11
1	172030001	172070000	BW11
1	172040001	172080000	BW11
1	172090001	172130000	BW11
1	172100001	172140000	BW11
1	172110001	172150000	BW11
1	172120001	172160000	BW11
1	172130001	172170000	BW11
1	172140001	172180000	BW11
1	172150001	172190000	BW11
1	172160001	172200000	BW11
1	172170001	172210000	BW11
1	172180001	172220000	BW11
1	172190001	172230000	BW11
1	172200001	172240000	BW11
1	172210001	172250000	BW11
1	172310001	172350000	BW11
1	172320001	172360000	BW11
1	172330001	172370000	BW11
1	172350001	172390000	BW11
1	174220001	174260000	BW11
1	174230001	174270000	BW11
1	174240001	174280000	BW11
1	174250001	174290000	BW11
1	174300001	174340000	BW11
1	174310001	174350000	BW11
1	174320001	174360000	BW11
1	174880001	174920000	BW11
1	179520001	179560000	BW11
1	179530001	179570000	BW11
1	180840001	180880000	BW11
1	184420001	184460000	BW11
1	184430001	184470000	BW11
1	184860001	184900000	BW11
1	184880001	184920000	BW11
1	184900001	184940000	BW11
1	184910001	184950000	BW11
1	184920001	184960000	BW11
1	184930001	184970000	BW11
1	184940001	184980000	BW11
1	185550001	185590000	BW11
1	185850001	185890000	BW11
1	185860001	185900000	BW11
1	186560001	186600000	BW11
1	9640001	9680000	BW11
1	9650001	9690000	BW11
1	9660001	9700000	BW11
1	9670001	9710000	BW11
1	13900001	13940000	BW11
1	13910001	13950000	BW11
1	39240001	39280000	BW11
1	40650001	40690000	BW11
1	41820001	41860000	BW11
1	41830001	41870000	BW11
1	41840001	41880000	BW11
1	120060001	120100000	BW11
1	120070001	120110000	BW11
1	120080001	120120000	BW11
1	120090001	120130000	BW11
1	120100001	120140000	BW11
1	124700001	124740000	BW11
1	124710001	124750000	BW11
1	124720001	124760000	BW11
1	124730001	124770000	BW11
1	124810001	124850000	BW11
1	124820001	124860000	BW11
1	124830001	124870000	BW11
1	127580001	127620000	BW11
1	128140001	128180000	BW11
1	128150001	128190000	BW11
1	128160001	128200000	BW11
1	128220001	128260000	BW11
1	128230001	128270000	BW11
1	128290001	128330000	BW11
1	128300001	128340000	BW11
1	128310001	128350000	BW11
1	128320001	128360000	BW11
1	128330001	128370000	BW11
1	142900001	142940000	BW11
1	142910001	142950000	BW11
1	143010001	143050000	BW11
1	143020001	143060000	BW11
1	143540001	143580000	BW11
1	143550001	143590000	BW11
1	143590001	143630000	BW11
1	143600001	143640000	BW11
1	143610001	143650000	BW11
1	144160001	144200000	BW11
1	164900001	164940000	BW11
1	164910001	164950000	BW11
1	164920001	164960000	BW11
1	164930001	164970000	BW11
1	164940001	164980000	BW11
1	164950001	164990000	BW11
1	168280001	168320000	BW11
1	169500001	169540000	BW11
1	169510001	169550000	BW11
1	169520001	169560000	BW11
1	169710001	169750000	BW11
1	169720001	169760000	BW11
1	169730001	169770000	BW11
1	169740001	169780000	BW11
1	170180001	170220000	BW11
1	170190001	170230000	BW11
1	170200001	170240000	BW11
1	170210001	170250000	BW11
1	170220001	170260000	BW11
1	170230001	170270000	BW11
1	170240001	170280000	BW11
1	170320001	170360000	BW11
1	170340001	170380000	BW11
1	170450001	170490000	BW11
1	170460001	170500000	BW11
1	170470001	170510000	BW11
1	170480001	170520000	BW11
1	170890001	170930000	BW11
1	170900001	170940000	BW11
1	170910001	170950000	BW11
1	170920001	170960000	BW11
1	170930001	170970000	BW11
1	170940001	170980000	BW11
1	170950001	170990000	BW11
1	170960001	171000000	BW11
1	170970001	171010000	BW11
1	170980001	171020000	BW11
1	170990001	171030000	BW11
1	171000001	171040000	BW11
1	171010001	171050000	BW11
1	171020001	171060000	BW11
1	171030001	171070000	BW11
1	171040001	171080000	BW11
1	171050001	171090000	BW11
1	171090001	171130000	BW11
1	171110001	171150000	BW11
1	171170001	171210000	BW11
1	171180001	171220000	BW11
1	171330001	171370000	BW11
1	171480001	171520000	BW11
1	171490001	171530000	BW11
1	171900001	171940000	BW11
1	171910001	171950000	BW11
1	172510001	172550000	BW11
1	172520001	172560000	BW11
1	172530001	172570000	BW11
1	172540001	172580000	BW11
1	172550001	172590000	BW11
1	172560001	172600000	BW11
1	172570001	172610000	BW11
1	172620001	172660000	BW11
1	172710001	172750000	BW11
1	172740001	172780000	BW11
1	172760001	172800000	BW11
1	172770001	172810000	BW11
1	172780001	172820000	BW11
1	172790001	172830000	BW11
1	172800001	172840000	BW11
1	172940001	172980000	BW11
1	172950001	172990000	BW11
1	173110001	173150000	BW11
1	173120001	173160000	BW11
1	173660001	173700000	BW11
1	174150001	174190000	BW11
1	174160001	174200000	BW11
1	174170001	174210000	BW11
1	174180001	174220000	BW11
1	174590001	174630000	BW11
1	174600001	174640000	BW11
1	174610001	174650000	BW11
1	174620001	174660000	BW11
1	174630001	174670000	BW11
1	174640001	174680000	BW11
1	174650001	174690000	BW11
1	174660001	174700000	BW11
1	174670001	174710000	BW11
1	174790001	174830000	BW11
1	174800001	174840000	BW11
1	174810001	174850000	BW11
1	174910001	174950000	BW11
1	174920001	174960000	BW11
1	174980001	175020000	BW11
1	175050001	175090000	BW11
1	175060001	175100000	BW11
1	175070001	175110000	BW11
1	175160001	175200000	BW11
1	175170001	175210000	BW11
1	175180001	175220000	BW11
1	175190001	175230000	BW11
1	175200001	175240000	BW11
1	175320001	175360000	BW11
1	175330001	175370000	BW11
1	175340001	175380000	BW11
1	175350001	175390000	BW11
1	175360001	175400000	BW11
1	175370001	175410000	BW11
1	175380001	175420000	BW11
1	175390001	175430000	BW11
1	175400001	175440000	BW11
1	175410001	175450000	BW11
1	175420001	175460000	BW11
1	175470001	175510000	BW11
1	175550001	175590000	BW11
1	175560001	175600000	BW11
1	175570001	175610000	BW11
1	175580001	175620000	BW11
1	175590001	175630000	BW11
1	175600001	175640000	BW11
1	175610001	175650000	BW11
1	175620001	175660000	BW11
1	175630001	175670000	BW11
1	175640001	175680000	BW11
1	175650001	175690000	BW11
1	175660001	175700000	BW11
1	175670001	175710000	BW11
1	175680001	175720000	BW11
1	175690001	175730000	BW11
1	175700001	175740000	BW11
1	175710001	175750000	BW11
1	175720001	175760000	BW11
1	175730001	175770000	BW11
1	175740001	175780000	BW11
1	175750001	175790000	BW11
1	175760001	175800000	BW11
1	175770001	175810000	BW11
1	175820001	175860000	BW11
1	175830001	175870000	BW11
1	175840001	175880000	BW11
1	175850001	175890000	BW11
1	175860001	175900000	BW11
1	175930001	175970000	BW11
1	175940001	175980000	BW11
1	175950001	175990000	BW11
1	175960001	176000000	BW11
1	175970001	176010000	BW11
1	175980001	176020000	BW11
1	175990001	176030000	BW11
1	176000001	176040000	BW11
1	176010001	176050000	BW11
1	176020001	176060000	BW11
1	176030001	176070000	BW11
1	176040001	176080000	BW11
1	176050001	176090000	BW11
1	176060001	176100000	BW11
1	176070001	176110000	BW11
1	176080001	176120000	BW11
1	176090001	176130000	BW11
1	176100001	176140000	BW11
1	176110001	176150000	BW11
1	176120001	176160000	BW11
1	176130001	176170000	BW11
1	176140001	176180000	BW11
1	176150001	176190000	BW11
1	176160001	176200000	BW11
1	176170001	176210000	BW11
1	176180001	176220000	BW11
1	176190001	176230000	BW11
1	176200001	176240000	BW11
1	176210001	176250000	BW11
1	176220001	176260000	BW11
1	176230001	176270000	BW11
1	176240001	176280000	BW11
1	176250001	176290000	BW11
1	176260001	176300000	BW11
1	176270001	176310000	BW11
1	176280001	176320000	BW11
1	176290001	176330000	BW11
1	176300001	176340000	BW11
1	176310001	176350000	BW11
1	176320001	176360000	BW11
1	176330001	176370000	BW11
1	176340001	176380000	BW11
1	176380001	176420000	BW11
1	176390001	176430000	BW11
1	176400001	176440000	BW11
1	176410001	176450000	BW11
1	176420001	176460000	BW11
1	176430001	176470000	BW11
1	176440001	176480000	BW11
1	176450001	176490000	BW11
1	176460001	176500000	BW11
1	176470001	176510000	BW11
1	176480001	176520000	BW11
1	176490001	176530000	BW11
1	176500001	176540000	BW11
1	176510001	176550000	BW11
1	176520001	176560000	BW11
1	176530001	176570000	BW11
1	176540001	176580000	BW11
1	176550001	176590000	BW11
1	176560001	176600000	BW11
1	176570001	176610000	BW11
1	176580001	176620000	BW11
1	176590001	176630000	BW11
1	176600001	176640000	BW11
1	176610001	176650000	BW11
1	176620001	176660000	BW11
1	176630001	176670000	BW11
1	176670001	176710000	BW11
1	176680001	176720000	BW11
1	176690001	176730000	BW11
1	176990001	177030000	BW11
1	177000001	177040000	BW11
1	177010001	177050000	BW11
1	177100001	177140000	BW11
1	177110001	177150000	BW11
1	177120001	177160000	BW11
1	177130001	177170000	BW11
1	177140001	177180000	BW11
1	177150001	177190000	BW11
1	177170001	177210000	BW11
1	177190001	177230000	BW11
1	177200001	177240000	BW11
1	177210001	177250000	BW11
1	177220001	177260000	BW11
1	177230001	177270000	BW11
1	177240001	177280000	BW11
1	177250001	177290000	BW11
1	177260001	177300000	BW11
1	177270001	177310000	BW11
1	177280001	177320000	BW11
1	177290001	177330000	BW11
1	177350001	177390000	BW11
1	177360001	177400000	BW11
1	177370001	177410000	BW11
1	177380001	177420000	BW11
1	177390001	177430000	BW11
1	177400001	177440000	BW11
1	177410001	177450000	BW11
1	177420001	177460000	BW11
1	177430001	177470000	BW11
1	177440001	177480000	BW11
1	177450001	177490000	BW11
1	177460001	177500000	BW11
1	177490001	177530000	BW11
1	177500001	177540000	BW11
1	177510001	177550000	BW11
1	177520001	177560000	BW11
1	177530001	177570000	BW11
1	177540001	177580000	BW11
1	177550001	177590000	BW11
1	177560001	177600000	BW11
1	177570001	177610000	BW11
1	177580001	177620000	BW11
1	177590001	177630000	BW11
1	177600001	177640000	BW11
1	177610001	177650000	BW11
1	177620001	177660000	BW11
1	177650001	177690000	BW11
1	177660001	177700000	BW11
1	177670001	177710000	BW11
1	177680001	177720000	BW11
1	177690001	177730000	BW11
1	177700001	177740000	BW11
1	177710001	177750000	BW11
1	177720001	177760000	BW11
1	177730001	177770000	BW11
1	177740001	177780000	BW11
1	177810001	177850000	BW11
1	177820001	177860000	BW11
1	177830001	177870000	BW11
1	179720001	179760000	BW11
1	179730001	179770000	BW11
1	179740001	179780000	BW11
1	179910001	179950000	BW11
1	179920001	179960000	BW11
1	179930001	179970000	BW11
1	180140001	180180000	BW11
1	180680001	180720000	BW11
1	181130001	181170000	BW11
1	181190001	181230000	BW11
1	181310001	181350000	BW11
1	181320001	181360000	BW11
1	181330001	181370000	BW11
1	184510001	184550000	BW11
1	184520001	184560000	BW11
1	184530001	184570000	BW11
1	184540001	184580000	BW11
1	184550001	184590000	BW11
1	184710001	184750000	BW11
1	184720001	184760000	BW11
1	185700001	185740000	BW11
1	187390001	187430000	BW11
1	187400001	187440000	BW11
1	187760001	187800000	BW11
1	187770001	187810000	BW11
1	187780001	187820000	BW11
1	9000001	9040000	BW10
1	9010001	9050000	BW10
1	9020001	9060000	BW10
1	9030001	9070000	BW10
1	9080001	9120000	BW10
1	14050001	14090000	BW10
1	14060001	14100000	BW10
1	34270001	34310000	BW10
1	34280001	34320000	BW10
1	34290001	34330000	BW10
1	34300001	34340000	BW10
1	34510001	34550000	BW10
1	34520001	34560000	BW10
1	34950001	34990000	BW10
1	34960001	35000000	BW10
1	34970001	35010000	BW10
1	34980001	35020000	BW10
1	34990001	35030000	BW10
1	35000001	35040000	BW10
1	35010001	35050000	BW10
1	35020001	35060000	BW10
1	35030001	35070000	BW10
1	35040001	35080000	BW10
1	35230001	35270000	BW10
1	35580001	35620000	BW10
1	35590001	35630000	BW10
1	35700001	35740000	BW10
1	35710001	35750000	BW10
1	35720001	35760000	BW10
1	35870001	35910000	BW10
1	35880001	35920000	BW10
1	35890001	35930000	BW10
1	35900001	35940000	BW10
1	36030001	36070000	BW10
1	36040001	36080000	BW10
1	36050001	36090000	BW10
1	36060001	36100000	BW10
1	36110001	36150000	BW10
1	36120001	36160000	BW10
1	36130001	36170000	BW10
1	36140001	36180000	BW10
1	36150001	36190000	BW10
1	36160001	36200000	BW10
1	36200001	36240000	BW10
1	36210001	36250000	BW10
1	36220001	36260000	BW10
1	36230001	36270000	BW10
1	36390001	36430000	BW10
1	36400001	36440000	BW10
1	36410001	36450000	BW10
1	36420001	36460000	BW10
1	36430001	36470000	BW10
1	36440001	36480000	BW10
1	36580001	36620000	BW10
1	36590001	36630000	BW10
1	36600001	36640000	BW10
1	36680001	36720000	BW10
1	36690001	36730000	BW10
1	36700001	36740000	BW10
1	36710001	36750000	BW10
1	36720001	36760000	BW10
1	36730001	36770000	BW10
1	36830001	36870000	BW10
1	36840001	36880000	BW10
1	36900001	36940000	BW10
1	36910001	36950000	BW10
1	36920001	36960000	BW10
1	36960001	37000000	BW10
1	37030001	37070000	BW10
1	37040001	37080000	BW10
1	37050001	37090000	BW10
1	37110001	37150000	BW10
1	37120001	37160000	BW10
1	37130001	37170000	BW10
1	37140001	37180000	BW10
1	37230001	37270000	BW10
1	37240001	37280000	BW10
1	37260001	37300000	BW10
1	37280001	37320000	BW10
1	37290001	37330000	BW10
1	37300001	37340000	BW10
1	37310001	37350000	BW10
1	37320001	37360000	BW10
1	37330001	37370000	BW10
1	37340001	37380000	BW10
1	37350001	37390000	BW10
1	37360001	37400000	BW10
1	37370001	37410000	BW10
1	37380001	37420000	BW10
1	37400001	37440000	BW10
1	37410001	37450000	BW10
1	37420001	37460000	BW10
1	37430001	37470000	BW10
1	37440001	37480000	BW10
1	37450001	37490000	BW10
1	37460001	37500000	BW10
1	37470001	37510000	BW10
1	37480001	37520000	BW10
1	37490001	37530000	BW10
1	37500001	37540000	BW10
1	37510001	37550000	BW10
1	37520001	37560000	BW10
1	37530001	37570000	BW10
1	37540001	37580000	BW10
1	37550001	37590000	BW10
1	37560001	37600000	BW10
1	37570001	37610000	BW10
1	37580001	37620000	BW10
1	37590001	37630000	BW10
1	37600001	37640000	BW10
1	37610001	37650000	BW10
1	37620001	37660000	BW10
1	37630001	37670000	BW10
1	37640001	37680000	BW10
1	37650001	37690000	BW10
1	37670001	37710000	BW10
1	37680001	37720000	BW10
1	37690001	37730000	BW10
1	37700001	37740000	BW10
1	37710001	37750000	BW10
1	37720001	37760000	BW10
1	37730001	37770000	BW10
1	37740001	37780000	BW10
1	37750001	37790000	BW10
1	37760001	37800000	BW10
1	37770001	37810000	BW10
1	37780001	37820000	BW10
1	37790001	37830000	BW10
1	37800001	37840000	BW10
1	37810001	37850000	BW10
1	37820001	37860000	BW10
1	38030001	38070000	BW10
1	38040001	38080000	BW10
1	38050001	38090000	BW10
1	38100001	38140000	BW10
1	38110001	38150000	BW10
1	38120001	38160000	BW10
1	38130001	38170000	BW10
1	38140001	38180000	BW10
1	38150001	38190000	BW10
1	38170001	38210000	BW10
1	38260001	38300000	BW10
1	38290001	38330000	BW10
1	38310001	38350000	BW10
1	38320001	38360000	BW10
1	38350001	38390000	BW10
1	38360001	38400000	BW10
1	38490001	38530000	BW10
1	38500001	38540000	BW10
1	38510001	38550000	BW10
1	38520001	38560000	BW10
1	38530001	38570000	BW10
1	38540001	38580000	BW10
1	38550001	38590000	BW10
1	38560001	38600000	BW10
1	38680001	38720000	BW10
1	38690001	38730000	BW10
1	38750001	38790000	BW10
1	38760001	38800000	BW10
1	38770001	38810000	BW10
1	38780001	38820000	BW10
1	38790001	38830000	BW10
1	38800001	38840000	BW10
1	38820001	38860000	BW10
1	38940001	38980000	BW10
1	38950001	38990000	BW10
1	38960001	39000000	BW10
1	38970001	39010000	BW10
1	38980001	39020000	BW10
1	39040001	39080000	BW10
1	39280001	39320000	BW10
1	39290001	39330000	BW10
1	39300001	39340000	BW10
1	39350001	39390000	BW10
1	39360001	39400000	BW10
1	39370001	39410000	BW10
1	39490001	39530000	BW10
1	39500001	39540000	BW10
1	39550001	39590000	BW10
1	39560001	39600000	BW10
1	39570001	39610000	BW10
1	39620001	39660000	BW10
1	39650001	39690000	BW10
1	39690001	39730000	BW10
1	39700001	39740000	BW10
1	39710001	39750000	BW10
1	39720001	39760000	BW10
1	39790001	39830000	BW10
1	39800001	39840000	BW10
1	39810001	39850000	BW10
1	39960001	40000000	BW10
1	39970001	40010000	BW10
1	39980001	40020000	BW10
1	39990001	40030000	BW10
1	40000001	40040000	BW10
1	40010001	40050000	BW10
1	40020001	40060000	BW10
1	40030001	40070000	BW10
1	40040001	40080000	BW10
1	40050001	40090000	BW10
1	40060001	40100000	BW10
1	40070001	40110000	BW10
1	40080001	40120000	BW10
1	40090001	40130000	BW10
1	40100001	40140000	BW10
1	40110001	40150000	BW10
1	40120001	40160000	BW10
1	40130001	40170000	BW10
1	40140001	40180000	BW10
1	40150001	40190000	BW10
1	40160001	40200000	BW10
1	40170001	40210000	BW10
1	40180001	40220000	BW10
1	40190001	40230000	BW10
1	40330001	40370000	BW10
1	40340001	40380000	BW10
1	40350001	40390000	BW10
1	40360001	40400000	BW10
1	40510001	40550000	BW10
1	40520001	40560000	BW10
1	40530001	40570000	BW10
1	40610001	40650000	BW10
1	40840001	40880000	BW10
1	41080001	41120000	BW10
1	41120001	41160000	BW10
1	41200001	41240000	BW10
1	41210001	41250000	BW10
1	41320001	41360000	BW10
1	41330001	41370000	BW10
1	41370001	41410000	BW10
1	41380001	41420000	BW10
1	41390001	41430000	BW10
1	41400001	41440000	BW10
1	41410001	41450000	BW10
1	41420001	41460000	BW10
1	41430001	41470000	BW10
1	41440001	41480000	BW10
1	41450001	41490000	BW10
1	41460001	41500000	BW10
1	41480001	41520000	BW10
1	41490001	41530000	BW10
1	41500001	41540000	BW10
1	41510001	41550000	BW10
1	41520001	41560000	BW10
1	41530001	41570000	BW10
1	41540001	41580000	BW10
1	41550001	41590000	BW10
1	41790001	41830000	BW10
1	41880001	41920000	BW10
1	41890001	41930000	BW10
1	42550001	42590000	BW10
1	42560001	42600000	BW10
1	42570001	42610000	BW10
1	42580001	42620000	BW10
1	42660001	42700000	BW10
1	42670001	42710000	BW10
1	42680001	42720000	BW10
1	42690001	42730000	BW10
1	42730001	42770000	BW10
1	42740001	42780000	BW10
1	42770001	42810000	BW10
1	42780001	42820000	BW10
1	42800001	42840000	BW10
1	42820001	42860000	BW10
1	42910001	42950000	BW10
1	42920001	42960000	BW10
1	42930001	42970000	BW10
1	42940001	42980000	BW10
1	42950001	42990000	BW10
1	42960001	43000000	BW10
1	43180001	43220000	BW10
1	43200001	43240000	BW10
1	43220001	43260000	BW10
1	43230001	43270000	BW10
1	43240001	43280000	BW10
1	43250001	43290000	BW10
1	43350001	43390000	BW10
1	43490001	43530000	BW10
1	43500001	43540000	BW10
1	43510001	43550000	BW10
1	43620001	43660000	BW10
1	43670001	43710000	BW10
1	43680001	43720000	BW10
1	43690001	43730000	BW10
1	43700001	43740000	BW10
1	43720001	43760000	BW10
1	43730001	43770000	BW10
1	43780001	43820000	BW10
1	43790001	43830000	BW10
1	43800001	43840000	BW10
1	43810001	43850000	BW10
1	43820001	43860000	BW10
1	43830001	43870000	BW10
1	43890001	43930000	BW10
1	43900001	43940000	BW10
1	43910001	43950000	BW10
1	43950001	43990000	BW10
1	43970001	44010000	BW10
1	43980001	44020000	BW10
1	43990001	44030000	BW10
1	44000001	44040000	BW10
1	44010001	44050000	BW10
1	44040001	44080000	BW10
1	44650001	44690000	BW10
1	44660001	44700000	BW10
1	44670001	44710000	BW10
1	44680001	44720000	BW10
1	44690001	44730000	BW10
1	44700001	44740000	BW10
1	44710001	44750000	BW10
1	44760001	44800000	BW10
1	44830001	44870000	BW10
1	44850001	44890000	BW10
1	44970001	45010000	BW10
1	49020001	49060000	BW10
1	49030001	49070000	BW10
1	49040001	49080000	BW10
1	49050001	49090000	BW10
1	49060001	49100000	BW10
1	52890001	52930000	BW10
1	52900001	52940000	BW10
1	52910001	52950000	BW10
1	54900001	54940000	BW10
1	54910001	54950000	BW10
1	54920001	54960000	BW10
1	54930001	54970000	BW10
1	55000001	55040000	BW10
1	55010001	55050000	BW10
1	55020001	55060000	BW10
1	55030001	55070000	BW10
1	55040001	55080000	BW10
1	55100001	55140000	BW10
1	55110001	55150000	BW10
1	103610001	103650000	BW10
1	103620001	103660000	BW10
1	103630001	103670000	BW10
1	103640001	103680000	BW10
1	103650001	103690000	BW10
1	103660001	103700000	BW10
1	148470001	148510000	BW10
1	149820001	149860000	BW10
1	149830001	149870000	BW10
1	149840001	149880000	BW10
1	149850001	149890000	BW10
1	149860001	149900000	BW10
1	149870001	149910000	BW10
1	149880001	149920000	BW10
1	149890001	149930000	BW10
1	149900001	149940000	BW10
1	149910001	149950000	BW10
1	149920001	149960000	BW10
1	150600001	150640000	BW10
1	150790001	150830000	BW10
1	151730001	151770000	BW10
1	153720001	153760000	BW10
1	166100001	166140000	BW10
1	166110001	166150000	BW10
1	166120001	166160000	BW10
1	169270001	169310000	BW10
1	169280001	169320000	BW10
1	171250001	171290000	BW10
1	171260001	171300000	BW10
1	171270001	171310000	BW10
1	171280001	171320000	BW10
1	171990001	172030000	BW10
1	172000001	172040000	BW10
1	172010001	172050000	BW10
1	172020001	172060000	BW10
1	172090001	172130000	BW10
1	172100001	172140000	BW10
1	172110001	172150000	BW10
1	172120001	172160000	BW10
1	172130001	172170000	BW10
1	172140001	172180000	BW10
1	172150001	172190000	BW10
1	172160001	172200000	BW10
1	172170001	172210000	BW10
1	172180001	172220000	BW10
1	174220001	174260000	BW10
1	174230001	174270000	BW10
1	174240001	174280000	BW10
1	174250001	174290000	BW10
1	174300001	174340000	BW10
1	174310001	174350000	BW10
1	174320001	174360000	BW10
1	174550001	174590000	BW10
1	174560001	174600000	BW10
1	174870001	174910000	BW10
1	174880001	174920000	BW10
1	175280001	175320000	BW10
1	175290001	175330000	BW10
1	176720001	176760000	BW10
1	1860001	1900000	BW10
1	1920001	1960000	BW10
1	1930001	1970000	BW10
1	1940001	1980000	BW10
1	9600001	9640000	BW10
1	9640001	9680000	BW10
1	9650001	9690000	BW10
1	9660001	9700000	BW10
1	9670001	9710000	BW10
1	9680001	9720000	BW10
1	9690001	9730000	BW10
1	9700001	9740000	BW10
1	9930001	9970000	BW10
1	9940001	9980000	BW10
1	9950001	9990000	BW10
1	9960001	10000000	BW10
1	17010001	17050000	BW10
1	17050001	17090000	BW10
1	17100001	17140000	BW10
1	18440001	18480000	BW10
1	18660001	18700000	BW10
1	18670001	18710000	BW10
1	18680001	18720000	BW10
1	19600001	19640000	BW10
1	19630001	19670000	BW10
1	19970001	20010000	BW10
1	24550001	24590000	BW10
1	24560001	24600000	BW10
1	40650001	40690000	BW10
1	41830001	41870000	BW10
1	41840001	41880000	BW10
1	56490001	56530000	BW10
1	56500001	56540000	BW10
1	124710001	124750000	BW10
1	141580001	141620000	BW10
1	141800001	141840000	BW10
1	141810001	141850000	BW10
1	142210001	142250000	BW10
1	142220001	142260000	BW10
1	142230001	142270000	BW10
1	142240001	142280000	BW10
1	142280001	142320000	BW10
1	142290001	142330000	BW10
1	142900001	142940000	BW10
1	143010001	143050000	BW10
1	143020001	143060000	BW10
1	143400001	143440000	BW10
1	143410001	143450000	BW10
1	143420001	143460000	BW10
1	143430001	143470000	BW10
1	143440001	143480000	BW10
1	143540001	143580000	BW10
1	143550001	143590000	BW10
1	143560001	143600000	BW10
1	143570001	143610000	BW10
1	143580001	143620000	BW10
1	143590001	143630000	BW10
1	143600001	143640000	BW10
1	143610001	143650000	BW10
1	143620001	143660000	BW10
1	144150001	144190000	BW10
1	144160001	144200000	BW10
1	145080001	145120000	BW10
1	145090001	145130000	BW10
1	145100001	145140000	BW10
1	146490001	146530000	BW10
1	147260001	147300000	BW10
1	147270001	147310000	BW10
1	148780001	148820000	BW10
1	149370001	149410000	BW10
1	169490001	169530000	BW10
1	169500001	169540000	BW10
1	169510001	169550000	BW10
1	169520001	169560000	BW10
1	169530001	169570000	BW10
1	169710001	169750000	BW10
1	169720001	169760000	BW10
1	169730001	169770000	BW10
1	169740001	169780000	BW10
1	169870001	169910000	BW10
1	170210001	170250000	BW10
1	170220001	170260000	BW10
1	170320001	170360000	BW10
1	170330001	170370000	BW10
1	170340001	170380000	BW10
1	170450001	170490000	BW10
1	170460001	170500000	BW10
1	170470001	170510000	BW10
1	170480001	170520000	BW10
1	170940001	170980000	BW10
1	170970001	171010000	BW10
1	170980001	171020000	BW10
1	170990001	171030000	BW10
1	171000001	171040000	BW10
1	171010001	171050000	BW10
1	171020001	171060000	BW10
1	171030001	171070000	BW10
1	171040001	171080000	BW10
1	171050001	171090000	BW10
1	171090001	171130000	BW10
1	171100001	171140000	BW10
1	171110001	171150000	BW10
1	171170001	171210000	BW10
1	171180001	171220000	BW10
1	171900001	171940000	BW10
1	172510001	172550000	BW10
1	172520001	172560000	BW10
1	172530001	172570000	BW10
1	172540001	172580000	BW10
1	172550001	172590000	BW10
1	172560001	172600000	BW10
1	172570001	172610000	BW10
1	172580001	172620000	BW10
1	172590001	172630000	BW10
1	172600001	172640000	BW10
1	172610001	172650000	BW10
1	172620001	172660000	BW10
1	172630001	172670000	BW10
1	172640001	172680000	BW10
1	172700001	172740000	BW10
1	172710001	172750000	BW10
1	172720001	172760000	BW10
1	172730001	172770000	BW10
1	172740001	172780000	BW10
1	172750001	172790000	BW10
1	172760001	172800000	BW10
1	172770001	172810000	BW10
1	172780001	172820000	BW10
1	172790001	172830000	BW10
1	172800001	172840000	BW10
1	172930001	172970000	BW10
1	172940001	172980000	BW10
1	172950001	172990000	BW10
[truncated: 20,900 more rows]
